# Supplementary material for: Screening North American plant extracts in vitro against Trypanosoma brucei for discovery of new antitrypanosomal drug leads
Source: PubMed Central journal article supplement (PMC4870785; doi:10.1186/s12906-016-1122-0), 2016-05-18
Supplement: 12906_2016_1122_MOESM1_ESM.pdf [file 12906_2016_1122_MOESM1_ESM.pdf]

# **Screening North American plant extracts in vitro against *Trypanosoma brucei*, the causative agent for Human African Trypanosomiasis**

**Surendra K. Jain<sup>a,b</sup>, Melissa R. Jacob<sup>a</sup>, Larry A. Walker<sup>a,b</sup> and Babu L. Tekwani<sup>a,b,\*</sup>**

<sup>a</sup>*National center for Natural products Research, Research Institute of Pharmaceutical Sciences, School of Pharmacy, University of Mississippi, University, MS, 38677, USA*

<sup>b</sup>*Department of BioMolecular Sciences, University of Mississippi, University, MS, 38677, USA*

[btekwani@olemiss.edu](mailto:btekwani@olemiss.edu)

**Supplement Data**

Table S 1 North American plants screened in vitro against *Trypanosoma breuei*, the causative agent for human African trypanosomiasis

| NPID  | SampleName                      | Genus          | Species        | Family          | SourceCommonName                                        | Plant Part | Geographical Location | Collector               | Collector # | % inhibition of T. brucei | Concentration (µg/mL) | Remark |
|-------|---------------------------------|----------------|----------------|-----------------|---------------------------------------------------------|------------|-----------------------|-------------------------|-------------|---------------------------|-----------------------|--------|
| 81872 | <i>Myriophyllum hippuroides</i> | Myriophyllum   | hippuroides    | Haloragaceae    | Western watermilfoil                                    | PX         | OR                    | Tracy Scott             | 75          | 9.40                      | 20                    |        |
| 81873 | <i>Angelica lucida</i>          | Angelica       | lucida         | Apiaceae        | Seacoast angelica, sea-watch                            | LF         | OR                    | Tracy Scott             | 76          | 7.05                      | 20                    |        |
| 81874 | <i>Angelica lucida</i>          | Angelica       | lucida         | Apiaceae        | Seacoast angelica, sea-watch                            | ST         | OR                    | Tracy Scott             | 76          | 1.12                      | 20                    |        |
| 81875 | <i>Angelica lucida</i>          | Angelica       | lucida         | Apiaceae        | Seacoast angelica, sea-watch                            | FR         | OR                    | Tracy Scott             | 76          | 64.48                     | 20                    |        |
| 81876 | <i>Allium cernuum</i>           | Allium         | cernuum        | Liliaceae       | Nodding onion                                           | P          | CO                    | Greg Gust               | 817         | 4.88                      | 20                    |        |
| 81877 | <i>Ulex europaea</i>            | Ulex           | europaeus      | Fabaceae        | Gorse                                                   | BK         | OR                    | Andrew Keith Townesmith | 584         | 98.27                     | 20                    | RT     |
| 81878 | <i>Heracleum lanatum</i>        | Heracleum      | lanatum        | Apiaceae        | Hogweed                                                 | FL         | OR                    | Andrew Keith Townesmith | 529         | 27.28                     | 20                    |        |
| 81879 | <i>Digitalis purpurea</i>       | Digitalis      | purpurea       | Plantaginaceae  | Foxglove                                                | FR         | OR                    | Tracy Scott             | 7           | 19.88                     | 20                    |        |
| 81880 | <i>Alnus rubra</i>              | Alnus          | rubra          | Betulaceae      | Red alder                                               | BK         | OR                    | Tracy Scott             | 19          | 90.66                     | 20                    | RT     |
| 81881 | <i>Rumex obtusifolius</i>       | Rumex          | obtusifolius   | Polygonaceae    | Round-leaved dock                                       | LF         | OR                    | Andrew Keith Townesmith | 585         | NA                        | 20                    |        |
| 81882 | <i>Rumex obtusifolius</i>       | Rumex          | obtusifolius   | Polygonaceae    | Round-leaved dock                                       | ST         | OR                    | Andrew Keith Townesmith | 585         | 0.66                      | 20                    |        |
| 81883 | <i>Rumex obtusifolius</i>       | Rumex          | obtusifolius   | Polygonaceae    | Round-leaved dock                                       | FR         | OR                    | Andrew Keith Townesmith | 585         | 93.86                     | 20                    | RT     |
| 81884 | <i>Oxalis trillifolia</i>       | Oxalis         | trillifolia    | Oxalidaceae     | Threelobed woodsorrel                                   | P          | OR                    | Andrew Keith Townesmith | 587         | 4.01                      | 20                    |        |
| 81885 | <i>Petasites frigidus</i>       | Petasites      | frigidus       | Asteraceae      | Sweet coltsfoot                                         | RT         | OR                    | Tracy Scott             | 77          | 4.40                      | 20                    |        |
| 81886 | <i>Arctostaphylos canescens</i> | Arctostaphylos | canescens      | Ericaceae       | Hoary manzanita                                         | LF         | OR                    | Tracy Scott             | 79          | 97.33                     | 20                    | RT     |
| 81887 | <i>Arctostaphylos canescens</i> | Arctostaphylos | canescens      | Ericaceae       | Hoary manzanita                                         | ST         | OR                    | Tracy Scott             | 79          | 13.89                     | 20                    |        |
| 81888 | <i>Ceanothus integerrimus</i>   | Ceanothus      | integerrimus   | Rhamnaceae      | Deer brush                                              | ST         | OR                    | Tracy Scott             | 80          | 18.73                     | 20                    |        |
| 81889 | <i>Boykinia major</i>           | Boykinia       | major          | Saxifragaceae   | Large Boykinia                                          | LF         | OR                    | Tracy Scott             | 81          | 63.36                     | 20                    |        |
| 81890 | <i>Boykinia major</i>           | Boykinia       | major          | Saxifragaceae   | Large Boykinia                                          | RT         | OR                    | Tracy Scott             | 81          | 92.90                     | 20                    | RT     |
| 81891 | <i>Dicentra formosa</i>         | Dicentra       | formosa        | Fumariaceae     | Western bleeding heart, Pacific bleeding heart          | P          | OR                    | Tracy Scott             | 82          | 7.08                      | 20                    |        |
| 81892 | <i>Phacelia hastata</i>         | Phacelia       | hastata        | Hydrophyllaceae | Silverleaf phacelia, scorpionweed                       | PX         | OR                    | Andrew Keith Townesmith | 588         | 94.27                     | 20                    | RT     |
| 81893 | <i>Phacelia hastata</i>         | Phacelia       | hastata        | Hydrophyllaceae | Silverleaf phacelia, scorpionweed                       | RT         | OR                    | Andrew Keith Townesmith | 588         | 72.23                     | 20                    |        |
| 81894 | <i>Pseudotsuga menziesii</i>    | Pseudotsuga    | menziesii      | Pinaceae        | Douglas fir                                             | FR         | OR                    | Andrew Keith Townesmith | 589         | 21.07                     | 20                    |        |
| 81895 | <i>Abies procera</i>            | Abies          | procera        | Pinaceae        | Noble fir                                               | FR         | OR                    | Andrew Keith Townesmith | 590         | 99.36                     | 20                    | RT     |
| 81896 | <i>Abies procera</i>            | Abies          | procera        | Pinaceae        | Noble fir                                               | BK         | OR                    | Andrew Keith Townesmith | 590         | 98.85                     | 20                    | RT     |
| 81897 | <i>Juniperus communis</i>       | Juniperus      | communis       | Cupressaceae    | Juniper                                                 | LF-ST      | OR                    | Andrew Keith Townesmith | 592         | 98.61                     | 20                    | RT     |
| 81898 | <i>Sorbus cf. sitchensis</i>    | Sorbus         | cf. sitchensis | Rosaceae        | Sitka mountain ash                                      | FR         | OR                    | Andrew Keith Townesmith | 593         | 0.63                      | 20                    |        |
| 81899 | <i>Boykinia occidentalis</i>    | Boykinia       | occidentalis   | Saxifragaceae   | Coastal brookfoam                                       | P          | OR                    | Andrew Keith Townesmith | 595         | 95.11                     | 20                    | RT     |
| 81900 | <i>Gaultheria ovatifolia</i>    | Gaultheria     | ovatifolia     | Ericaceae       | Mountain checkerberry                                   | P          | OR                    | Andrew Keith Townesmith | 597         | 93.33                     | 20                    | RT     |
| 81901 | <i>Lupinus albifrons</i>        | Lupinus        | albifrons      | Fabaceae        | Silver lupine, white-leaf bush lupine, evergreen lupine | LF         | OR                    | Andrew Keith Townesmith | 598         | 26.87                     | 20                    |        |
| 81902 | <i>Lupinus albifrons</i>        | Lupinus        | albifrons      | Fabaceae        | Silver lupine, white-leaf bush lupine, evergreen lupine | ST-RT      | OR                    | Andrew Keith Townesmith | 598         | 12.39                     | 20                    |        |
| 81903 | <i>Lycopodium clavatum</i>      | Lycopodium     | clavatum       | Lycopodiaceae   | Common club moss                                        | PX         | OR                    | Andrew Keith Townesmith | 599         | 14.69                     | 20                    |        |
| 81904 | <i>Ribes cereum</i>             | Ribes          | cereum         | Grossulariaceae | Wax currant                                             | ST         | OR                    | Tracy Scott             | 85          | NA                        | 20                    |        |
| 81905 | <i>Lotus pinnatus</i>           | Lotus          | pinnatus       | Fabaceae        | Meadow bird's-foot trefoil, bog bird's-foot trefoil     | PX         | OR                    | Tracy Scott             | 87          | NA                        | 20                    |        |
| 81906 | <i>Stachys rigida</i>           | Stachys        | rigida         | Lamiaceae       | Rough hedgenettle                                       | PX         | OR                    | Tracy Scott             | 88          | 3.22                      | 20                    |        |
| 81907 | <i>Ribes lacustre</i>           | Ribes          | lacustre       | Grossulariaceae | Prickly blackcurrant                                    | PX         | OR                    | Tracy Scott             | 91          | 91.82                     | 20                    | RT     |
| 81908 | <i>Chrysolepis chrysophylla</i> | Chrysolepis    | chrysophylla   | Fagaceae        | Golden chinquapin                                       | FL         | OR                    | Andrew Keith Townesmith | 567         | 97.49                     | 20                    | RT     |
| 81909 | <i>Quercus kelloggii</i>        | Quercus        | kelloggii      | Fagaceae        | Californian black oak                                   | LF         | OR                    | Andrew Keith Townesmith | 601         | 89.18                     | 20                    |        |
| 81910 | <i>Lithocarpus densiflorus</i>  | Lithocarpus    | densiflorus    | Fagaceae        | Tanbark oak                                             | ST         | OR                    | Andrew Keith Townesmith | 602         | 13.81                     | 20                    |        |
| 81911 | <i>Eremocarpus setigerus</i>    | Eremocarpus    | setigerus      | Euphorbiaceae   | Doveweed                                                | P          | OR                    | Andrew Keith Townesmith | 603         | 83.54                     | 20                    |        |
| 81912 | <i>Quercus chrysolepis</i>      | Quercus        | chrysolepis    | Fagaceae        | Live oak                                                | LF         | OR                    | Andrew Keith Townesmith | 604         | 96.33                     | 20                    | RT     |
| 81913 | <i>Hypericum calycinum</i>      | Hypericum      | calycinum      | Hypericaceae    | Rose of Sharon                                          | LF         | OR                    | Andrew Keith Townesmith | 605         | 12.45                     | 20                    |        |
| 81914 | <i>Hypericum calycinum</i>      | Hypericum      | calycinum      | Hypericaceae    | Rose of Sharon                                          | RT         | OR                    | Andrew Keith Townesmith | 605         | 94.05                     | 20                    | RT     |
| 81915 | <i>Prunus domestica</i>         | Prunus         | domestica      | Rosaceae        | Plum                                                    | BK         | OR                    | Andrew Keith Townesmith | 606         | 8.23                      | 20                    |        |
| 81916 | <i>Oenanthe sarmentosa</i>      | Oenanthe       | sarmentosa     | Apiaceae        | Water dropwort                                          | P          | OR                    | Andrew Keith Townesmith | 607         | 10.60                     | 20                    |        |
| 81917 | <i>Calocedrus decurrens</i>     | Calocedrus     | decurrens      | Cupressaceae    | Incense cedar                                           | BK         | OR                    | Andrew Keith Townesmith | 600         | 49.08                     | 20                    |        |
| 81918 | <i>Quercus chrysolepis</i>      | Quercus        | chrysolepis    | Fagaceae        | Live oak                                                | BK         | OR                    | Andrew Keith Townesmith | 604         | 96.16                     | 20                    | RT     |
| 81919 | <i>Ribes roezlii</i>            | Ribes          | roezlii        | Grossulariaceae | Sierra gooseberry                                       | PX         | OR                    | Andrew Keith Townesmith | 608         | 98.61                     | 20                    | RT     |
| 81920 | <i>Vitis californica</i>        | Vitis          | californica    | Vitaceae        | California grape                                        | LF         | OR                    | Andrew Keith Townesmith | 609         | NA                        | 20                    |        |
| 81921 | <i>Vitis californica</i>        | Vitis          | californica    | Vitaceae        | California grape                                        | ST         | OR                    | Andrew Keith Townesmith | 609         | 1.17                      | 20                    |        |
| 81922 | <i>Vitis californica</i>        | Vitis          | californica    | Vitaceae        | California grape                                        | FR         | OR                    | Andrew Keith Townesmith | 609         | 1.84                      | 20                    |        |
| 81923 | <i>Mentzelia laevicaulis</i>    | Mentzelia      | laevicaulis    | Loasaceae       | Giant blazing star, smoothstem blazing star             | RT         | OR                    | Tracy Scott             | 92          | 7.52                      | 20                    |        |

|       |                                  |                |               |                  |                                                          |       |    |                         |     |        |    |    |
|-------|----------------------------------|----------------|---------------|------------------|----------------------------------------------------------|-------|----|-------------------------|-----|--------|----|----|
| 81924 | <i>Mentzelia laevicaulis</i>     | Mentzelia      | laevicaulis   | Loasaceae        | Giant blazing star, smoothstem blazing star              | LF    | OR | Tracy Scott             | 92  | 7.03   | 20 |    |
| 81925 | <i>Rhododendron occidentale</i>  | Rhododendron   | occidentale   | Ericaceae        | Western azalea                                           | LF    | OR | Tracy Scott             | 93  | 97.16  | 20 | RT |
| 81926 | <i>Rhododendron occidentale</i>  | Rhododendron   | occidentale   | Ericaceae        | Western azalea                                           | ST    | OR | Tracy Scott             | 93  | 17.02  | 20 |    |
| 81927 | <i>Aralia californica</i>        | Aralia         | californica   | Araliaceae       | Elk clover, California Aralia, California Spikenard      | FR    | OR | Tracy Scott             | 94  | 101.69 | 20 | RT |
| 81928 | <i>Aralia californica</i>        | Aralia         | californica   | Araliaceae       | Elk clover, California Aralia, California Spikenard      | ST    | OR | Tracy Scott             | 94  | NA     | 20 |    |
| 81929 | <i>Aralia californica</i>        | Aralia         | californica   | Araliaceae       | Elk clover, California Aralia, California Spikenard      | LF    | OR | Tracy Scott             | 94  | 100.08 | 20 | RT |
| 81930 | <i>Eriodictyon californicum</i>  | Eriodictyon    | californicum  | Hydrophyllaceae  | Yerba santa                                              | RT    | OR | Tracy Scott             | 95  | 89.75  | 20 |    |
| 81931 | <i>Eriodictyon californicum</i>  | Eriodictyon    | californicum  | Hydrophyllaceae  | Yerba santa                                              | LF    | OR | Tracy Scott             | 95  | 21.01  | 20 |    |
| 81932 | <i>Darmera peltata</i>           | Darmera        | peltata       | Saxifragaceae    | Umbrella plant                                           | LF    | OR | Tracy Scott             | 96  | 98.03  | 20 | RT |
| 81933 | <i>Darmera peltata</i>           | Darmera        | peltata       | Saxifragaceae    | Umbrella plant                                           | ST    | OR | Tracy Scott             | 96  | 12.12  | 20 |    |
| 81934 | <i>Garrya fremontii</i>          | Garrya         | fremontii     | Garryaceae       | Fever bush                                               | LF    | OR | Andrew Keith Townesmith | 611 | 12.57  | 20 |    |
| 81935 | <i>Garrya fremontii</i>          | Garrya         | fremontii     | Garryaceae       | Fever bush                                               | ST    | OR | Andrew Keith Townesmith | 611 | 20.72  | 20 |    |
| 81936 | <i>Amelanchier utahensis</i>     | Amelanchier    | utahensis     | Rosaceae         | Utah serviceberry                                        | LF    | OR | Andrew Keith Townesmith | 612 | 0.71   | 20 |    |
| 81937 | <i>Amelanchier utahensis</i>     | Amelanchier    | utahensis     | Rosaceae         | Utah serviceberry                                        | ST    | OR | Andrew Keith Townesmith | 612 | 3.60   | 20 |    |
| 81938 | <i>Cercocarpus betuloides</i>    | Cercocarpus    | betuloides    | Rosaceae         | Mountain mahogany                                        | LF-FR | OR | Andrew Keith Townesmith | 613 | 27.67  | 20 |    |
| 81939 | <i>Cercocarpus betuloides</i>    | Cercocarpus    | betuloides    | Rosaceae         | Mountain mahogany                                        | ST    | OR | Andrew Keith Townesmith | 613 | 12.27  | 20 |    |
| 81940 | <i>Arctostaphylos viscida</i>    | Arctostaphylos | viscida       | Ericaceae        | Whiteleaf manzanita, sticky manzanita                    | LF    | OR | Andrew Keith Townesmith | 614 | 99.07  | 20 | RT |
| 81941 | <i>Arctostaphylos viscida</i>    | Arctostaphylos | viscida       | Ericaceae        | Whiteleaf manzanita, sticky manzanita                    | ST    | OR | Andrew Keith Townesmith | 614 | 29.16  | 20 |    |
| 81942 | <i>Arctostaphylos viscida</i>    | Arctostaphylos | viscida       | Ericaceae        | Whiteleaf manzanita, sticky manzanita                    | FR    | OR | Andrew Keith Townesmith | 614 | 12.49  | 20 |    |
| 81943 | <i>Sanguisorba officinalis</i>   | Sanguisorba    | officinalis   | Rosaceae         | Great burnet                                             | LF    | OR | Tracy Scott             | 98  | 97.34  | 20 | RT |
| 81944 | <i>Sanguisorba officinalis</i>   | Sanguisorba    | officinalis   | Rosaceae         | Great burnet                                             | ST-FL | OR | Tracy Scott             | 98  | 96.20  | 20 | RT |
| 81945 | <i>Perideridia oregana</i>       | Perideridia    | oregana       | Apiaceae         | Squaw potato                                             | PX    | OR | Tracy Scott             | 99  | NA     | 20 |    |
| 81946 | <i>Lithocarpus densiflorus</i>   | Lithocarpus    | densiflorus   | Fagaceae         | Tanbark oak                                              | FR    | OR | Andrew Keith Townesmith | 602 | 97.51  | 20 | RT |
| 81947 | <i>Pinus lambertiana</i>         | Pinus          | lambertiana   | Pinaceae         | Sugar pine                                               | LF    | OR | Tracy Scott             | 100 | 99.14  | 20 | RT |
| 81948 | <i>Pinus lambertiana</i>         | Pinus          | lambertiana   | Pinaceae         | Sugar pine                                               | ST    | OR | Tracy Scott             | 100 | 11.62  | 20 |    |
| 81949 | <i>Pinus lambertiana</i>         | Pinus          | lambertiana   | Pinaceae         | Sugar pine                                               | BK    | OR | Tracy Scott             | 100 | 20.72  | 20 |    |
| 81950 | <i>Lonicera hispidula</i>        | Lonicera       | hispidula     | Caprifoliaceae   | Pink honeysuckle, California honeysuckle                 | P     | OR | Tracy Scott             | 101 | 13.11  | 20 |    |
| 81951 | <i>Lonicera ciliosa</i>          | Lonicera       | ciliosa       | Caprifoliaceae   | Orange honeysuckle                                       | LF-FR | OR | Tracy Scott             | 102 | 14.58  | 20 |    |
| 81952 | <i>Lonicera ciliosa</i>          | Lonicera       | ciliosa       | Caprifoliaceae   | Orange honeysuckle                                       | ST    | OR | Tracy Scott             | 102 | 0.02   | 20 |    |
| 81953 | <i>Eriogonum umbellatum</i>      | Eriogonum      | umbellatum    | Polygonaceae     | Buckwheat                                                | LF-ST | OR | Tracy Scott             | 104 | 96.97  | 20 | RT |
| 81954 | <i>Rhamnus californica</i>       | Rhamnus        | californica   | Rhamnaceae       | California buckthorn, coffeeberry                        | LF    | OR | Tracy Scott             | 107 | 8.75   | 20 |    |
| 81955 | <i>Rhamnus californica</i>       | Rhamnus        | californica   | Rhamnaceae       | California buckthorn, coffeeberry                        | ST    | OR | Tracy Scott             | 107 | 9.74   | 20 |    |
| 81956 | <i>Chrysothamnus nauseosus</i>   | Chrysothamnus  | nauseosus     | Asteraceae       | Rubber or grey rabbitbrush; chamisa                      | RT    | OR | Tracy Scott             | 108 | 26.02  | 20 |    |
| 81957 | <i>Arceuthobium campylopodum</i> | Arceuthobium   | campylopodum  | Viscaceae        | Western dwarf mistletoe                                  | PX    | OR | Andrew Keith Townesmith | 616 | 92.29  | 20 | RT |
| 81958 | <i>Goodyera oblongifolia</i>     | Goodyera       | oblongifolia  | Orchidaceae      | Western rattlesnake plantain                             | P     | OR | Andrew Keith Townesmith | 617 | 3.10   | 20 |    |
| 81959 | <i>Ceanothus cordulatus</i>      | Ceanothus      | cordulatus    | Rhamnaceae       | Whitethorn ceanothus, Mountain whitethorn                | PX    | OR | Andrew Keith Townesmith | 618 | 95.71  | 20 | RT |
| 82399 | <i>Lotus crassifolius</i>        | Lotus          | crassifolius  | Fabaceae         | Big deervetch; broad-leaved lotus                        | LF    | OR | Andrew Keith Townesmith | 619 | 3.03   | 20 |    |
| 82400 | <i>Lotus crassifolius</i>        | Lotus          | crassifolius  | Fabaceae         | Big deervetch; broad-leaved lotus                        | ST    | OR | Andrew Keith Townesmith | 619 | 24.49  | 20 |    |
| 82401 | <i>Lotus crassifolius</i>        | Lotus          | crassifolius  | Fabaceae         | Big deervetch; broad-leaved lotus                        | RT    | OR | Andrew Keith Townesmith | 619 | 89.87  | 20 |    |
| 82402 | <i>Lotus crassifolius</i>        | Lotus          | crassifolius  | Fabaceae         | Big deervetch; broad-leaved lotus                        | FR    | OR | Andrew Keith Townesmith | 619 | 97.76  | 20 | RT |
| 82403 | <i>Rumex salicifolius</i>        | Rumex          | salicifolius  | Polygonaceae     | Willow dock                                              | LF-FR | OR | Andrew Keith Townesmith | 620 | 5.84   | 20 |    |
| 82404 | <i>Rumex salicifolius</i>        | Rumex          | salicifolius  | Polygonaceae     | Willow dock                                              | ST    | OR | Andrew Keith Townesmith | 620 | 5.84   | 20 |    |
| 82405 | <i>Crataegus douglasii</i>       | Crataegus      | douglasii     | Rosaceae         | Black hawthorn                                           | FR    | OR | Tracy Scott             | 35  | 2.84   | 20 |    |
| 82406 | <i>Arbutus menziesii</i>         | Arbutus        | menziesii     | Ericaceae        | Madrona                                                  | FR    | OR | Andrew Keith Townesmith | 549 | 88.83  | 20 |    |
| 82407 | <i>Potentilla gracilis</i>       | Potentilla     | gracilis      | Rosaceae         | Slender Cinquefoil, or Graceful Cinquefoil               | ST-FR | OR | Andrew Keith Townesmith | 622 | 96.68  | 20 | RT |
| 82408 | <i>Verbascum blattaria</i>       | Verbascum      | blattaria     | Scrophulariaceae | Moth mullein                                             | LF-RT | OR | Andrew Keith Townesmith | 623 | 76.82  | 20 |    |
| 82409 | <i>Verbascum blattaria</i>       | Verbascum      | blattaria     | Scrophulariaceae | Moth mullein                                             | ST    | OR | Andrew Keith Townesmith | 623 | 11.08  | 20 |    |
| 82410 | <i>Verbascum blattaria</i>       | Verbascum      | blattaria     | Scrophulariaceae | Moth mullein                                             | FL    | OR | Andrew Keith Townesmith | 623 | 73.23  | 20 |    |
| 82411 | <i>Hylocomium cf. splendens</i>  | Hylocomium     | cf. splendens | Hylocomiaceae    | Glittering wood-moss; tair-step moss; mountain fern moss | P     | OR | Andrew Keith Townesmith | 634 | 100.10 | 20 | RT |
| 82412 | <i>Kindbergia oregana</i>        | Kindbergia     | oregana       | Brachytheciaceae | Oregon beaked moss                                       | P     | OR | Andrew Keith Townesmith | 638 | 43.72  | 20 |    |
| 82413 | <i>Quercus garryana</i>          | Quercus        | garryana      | Fagaceae         | Oregon white oak                                         | ST    | OR | Andrew Keith Townesmith | 640 | 79.09  | 20 |    |
| 82414 | <i>Strongylodon macrobotrys</i>  | Strongylodon   | macrobotrys   | Fabaceae         | Jade vine                                                | ST    | MO | Andrew Keith Townesmith | 644 | 11.83  | 20 |    |
| 82415 | <i>Dendrocalamus gigantea</i>    | Dendrocalamus  | gigantea      | Poaceae          | Giant Bamboo                                             | ST    | MO | Andrew Keith Townesmith | 645 | 9.58   | 20 |    |
| 82416 | <i>Bambusa vulgaris</i>          | Bambusa        | vulgaris      | Poaceae          | Common bamboo                                            | LF    | MO | Andrew Keith Townesmith | 646 | 9.99   | 20 |    |
| 82417 | <i>Bambusa vulgaris</i>          | Bambusa        | vulgaris      | Poaceae          | Common bamboo                                            | ST    | MO | Andrew Keith Townesmith | 646 | 14.55  | 20 |    |
| 82418 | <i>Marantochloa leucantha</i>    | Marantochloa   | leucantha     | Marantaceae      | Marantochloa                                             | LF    | MO | Andrew Keith Townesmith | 647 | 13.95  | 20 |    |

|       |                                     |                 |                |                  |                                                                   |          |    |                         |     |       |    |    |
|-------|-------------------------------------|-----------------|----------------|------------------|-------------------------------------------------------------------|----------|----|-------------------------|-----|-------|----|----|
| 82419 | <i>Marantochloa leucantha</i>       | Marantochloa    | leucantha      | Marantaceae      | Marantochloa                                                      | ST       | MO | Andrew Keith Townesmith | 647 | 10.36 | 20 |    |
| 82420 | <i>Dioscorea bulbifera</i>          | Dioscorea       | bulbifera      | Dioscoreaceae    | Yam                                                               | ST       | MO | Andrew Keith Townesmith | 648 | 11.33 | 20 |    |
| 82421 | <i>Saccharum officinarum</i>        | Saccharum       | officinarum    | Poaceae          | Sugarcane                                                         | LF       | MO | Andrew Keith Townesmith | 649 | 11.82 | 20 |    |
| 82422 | <i>Saccharum officinarum</i>        | Saccharum       | officinarum    | Poaceae          | Sugarcane                                                         | ST       | MO | Andrew Keith Townesmith | 649 | 12.39 | 20 |    |
| 82423 | <i>Ludovia lancifolia</i>           | Ludovia         | lancifolia     | Cyclanthaceae    | NULL                                                              | LF       | MO | Andrew Keith Townesmith | 651 | 99.31 | 20 | RT |
| 82424 | <i>Ludovia lancifolia</i>           | Ludovia         | lancifolia     | Cyclanthaceae    | NULL                                                              | ST       | MO | Andrew Keith Townesmith | 651 | 7.06  | 20 |    |
| 82425 | <i>Solandra longifolia</i>          | Solandra        | longiflora     | Solanaceae       | Chalice vine                                                      | ST       | MO | Andrew Keith Townesmith | 652 | 92.99 | 20 | RT |
| 82426 | <i>Clerodendron splendens</i>       | Clerodendrum    | splendens      | Lamiaceae        | Glorybower; bagflower; bleeding-heart                             | LF       | MO | Andrew Keith Townesmith | 653 | 97.93 | 20 | RT |
| 82427 | <i>Clerodendron splendens</i>       | Clerodendrum    | splendens      | Lamiaceae        | Glorybower; bagflower; bleeding-heart                             | ST       | MO | Andrew Keith Townesmith | 653 | 12.57 | 20 |    |
| 82428 | <i>Quercus ilex</i>                 | Quercus         | ilex           | Fagaceae         | Holly oak                                                         | LF       | MO | Andrew Keith Townesmith | 654 | 36.35 | 20 |    |
| 82429 | <i>Quercus ilex</i>                 | Quercus         | ilex           | Fagaceae         | Holly oak                                                         | ST       | MO | Andrew Keith Townesmith | 654 | 98.20 | 20 | RT |
| 82430 | <i>Medinilla magnifica</i>          | Medinilla       | magnifica      | Melastomataceae  | Chandelier tree                                                   | ST       | MO | Andrew Keith Townesmith | 656 | 98.25 | 20 | RT |
| 82431 | <i>Carludovica sulcata</i>          | Carludovica     | sulcata        | Cyclanthaceae    | NULL                                                              | LF       | MO | Andrew Keith Townesmith | 663 | 0.49  | 20 |    |
| 82432 | <i>Carludovica sulcata</i>          | Carludovica     | sulcata        | Cyclanthaceae    | NULL                                                              | ST       | MO | Andrew Keith Townesmith | 663 | NA    | 20 |    |
| 82433 | <i>Triplaris wiegeltiana</i>        | Triplaris       | wiegeltiana    | Polygonaceae     | Longjack, Longjohn                                                | LF       | MO | Andrew Keith Townesmith | 667 | 75.67 | 20 |    |
| 82434 | <i>Triplaris wiegeltiana</i>        | Triplaris       | wiegeltiana    | Polygonaceae     | Longjack, Longjohn                                                | ST       | MO | Andrew Keith Townesmith | 667 | 4.79  | 20 |    |
| 82435 | <i>Ceanothus greggii</i>            | Ceanothus       | greggii        | Rhamnaceae       | Desert ceanothus                                                  | LF       | CA | Tracy Scott             | 111 | 95.36 | 20 | RT |
| 82436 | <i>Quercus berberidifolia</i>       | Quercus         | berberidifolia | Fagaceae         | California scrub oak                                              | LF-ST    | CA | Tracy Scott             | 112 | 94.61 | 20 | RT |
| 82437 | <i>Garrya veatchii</i>              | Garrya          | veatchii       | Garryaceae       | Canyon silktassel; Veatch silktassel                              | ST       | CA | Tracy Scott             | 115 | NA    | 20 |    |
| 82438 | <i>Eriogonum fasciculatum</i>       | Eriogonum       | fasciculatum   | Polygonaceae     | California or Eastern Mojave buckwheat                            | LF       | CA | Karen Meyer             | 4   | 93.94 | 20 | RT |
| 82439 | <i>Heteromeles arbutifolia</i>      | Heteromeles     | arbutifolia    | Rosaceae         | Toyon                                                             | FR       | CA | Karen Meyer             | 3   | NA    | 20 |    |
| 82440 | <i>Rhus integrifolia</i>            | Rhus            | integrifolia   | Anacardiaceae    | Lemonade berry                                                    | LF       | CA | Karen Meyer             | 8   | 99.31 | 20 | RT |
| 82441 | <i>Quercus x acutidens</i>          | Quercus         | x acutidens    | Fagaceae         | Scrub oak                                                         | ST       | CA | Andrew Keith Townesmith | 674 | 93.94 | 20 | RT |
| 82442 | <i>Phoradendron macrophyllum</i>    | Phoradendron    | macrophyllum   | Viscaceae        | Colorado desert mistletoe; bigleaf mistletoe; Christmas mistletoe | LF-FL    | CA | Andrew Keith Townesmith | 675 | NA    | 20 |    |
| 82443 | <i>Artemisia californica</i>        | Artemisia       | californica    | Asteraceae       | Wormwood                                                          | ST       | CA | Andrew Keith Townesmith | 676 | NA    | 20 |    |
| 82444 | <i>Baccharis salicifolia</i>        | Baccharis       | salicifolia    | Asteraceae       | Mule's fat, seep willow                                           | LF-FL    | CA | Andrew Keith Townesmith | 685 | 97.64 | 20 | RT |
| 82445 | <i>Ceanothus cuneatus</i>           | Ceanothus       | cuneatus       | Rhamnaceae       | Buckbrush                                                         | ST       | CA | Andrew Keith Townesmith | 692 | 72.04 | 20 |    |
| 82446 | <i>Penstemon spectabilis</i>        | Penstemon       | spectabilis    | Scrophulariaceae | Showy penstemon                                                   | RT       | CA | Tracy Scott             | 134 | 92.03 | 20 | RT |
| 82447 | <i>Vinca major</i>                  | Vinca           | major          | Apocynaceae      | Greater periwinkle                                                | LF       | CA | Andrew Keith Townesmith | 694 | NA    | 20 |    |
| 82448 | <i>Capsella bursa-pastoris</i>      | Capsella        | bursa-pastoris | Brassicaceae     | Shepherd's purse                                                  | P        | CA | Andrew Keith Townesmith | 699 | NA    | 20 |    |
| 82449 | <i>Alnus rhombifolia</i>            | Alnus           | rhombifolia    | Betulaceae       | White alder                                                       | FL       | CA | Andrew Keith Townesmith | 702 | 94.54 | 20 | RT |
| 82450 | <i>Salvia leucophylla</i>           | Salvia          | leucophylla    | Lamiaceae        | Purple sage                                                       | ST       | CA | Tracy Scott             | 147 | 1.87  | 20 |    |
| 82451 | <i>Baccharis pilularis</i>          | Baccharis       | pilularis      | Asteraceae       | Dwarf chaparral broom                                             | LF       | CA | Tracy Scott             | 148 | 98.06 | 20 | RT |
| 82452 | <i>Baccharis pilularis</i>          | Baccharis       | pilularis      | Asteraceae       | Dwarf chaparral broom                                             | ST       | CA | Tracy Scott             | 148 | NA    | 20 |    |
| 82453 | <i>Hoita macrostachya</i>           | Hoita           | macrostachya   | Fabaceae         | Large leatherrroot                                                | LF       | CA | Tracy Scott             | 151 | 96.77 | 20 | RT |
| 82454 | <i>Fraxinus dipetala</i>            | Fraxinus        | dipetala       | Oleaceae         | California or two-petal ash                                       | ST       | CA | Andrew Keith Townesmith | 705 | NA    | 20 |    |
| 82455 | <i>Rhamnus californica</i>          | Rhamnus         | californica    | Rhamnaceae       | California buckthorn, coffeeberry                                 | LF       | CA | Andrew Keith Townesmith | 708 | 0.93  | 20 |    |
| 82456 | <i>Polypodium californicum</i>      | Polypodium      | californicum   | Polypodiaceae    | California polypody                                               | P        | CA | Andrew Keith Townesmith | 710 | NA    | 20 |    |
| 82457 | <i>Fremontodendron californicum</i> | Fremontodendron | californicum   | Sterculiaceae    | Flannel flower                                                    | ST       | CA | Andrew Keith Townesmith | 711 | NA    | 20 |    |
| 82458 | <i>Chrysothamnus nauseosus</i>      | Chrysothamnus   | nauseosus      | Asteraceae       | Rubber or grey rabbitbrush; chamisa                               | ST       | CA | Andrew Keith Townesmith | 712 | 10.39 | 20 |    |
| 82459 | <i>Quercus wislizenii</i>           | Quercus         | wislizenii     | Fagaceae         | Interior live oak                                                 | LF       | CA | Andrew Keith Townesmith | 713 | 63.20 | 20 |    |
| 82460 | <i>Ceanothus spinosa</i>            | Ceanothus       | spinosa        | Rhamnaceae       | Greenbark ceanothus; redheart                                     | LF       | CA | Tracy Scott             | 154 | 94.57 | 20 | RT |
| 82461 | <i>Ceanothus spinosus</i>           | Ceanothus       | spinosus       | Rhamnaceae       | Greenbark ceanothus; redheart                                     | ST       | CA | Tracy Scott             | 154 | 93.97 | 20 | RT |
| 82462 | <i>Mimulus longiflorus</i>          | Mimulus         | longiflorus    | Scrophulariaceae | Southern bush Monkey-flower                                       | ST       | CA | Tracy Scott             | 156 | NA    | 20 |    |
| 82463 | <i>Mimulus longiflorus</i>          | Mimulus         | longiflorus    | Scrophulariaceae | Southern bush Monkey-flower                                       | RT       | CA | Tracy Scott             | 156 | 91.76 | 20 | RT |
| 82464 | <i>Lotus grandiflorus</i>           | Lotus           | grandiflorus   | Fabaceae         | Chaparral bird's-foot trefoil                                     | ST       | CA | Karen Meyer             | 28  | NA    | 20 |    |
| 82465 | <i>Malva sylvestris</i>             | Malva           | sylvestris     | Malvaceae        | Mallow                                                            | ST       | CA | Karen Meyer             | 30  | NA    | 20 |    |
| 82466 | <i>Lepechinia calycina</i>          | Lepechinia      | calycina       | Lamiaceae        | Pitcher sage; woodbalm                                            | LF       | CA | Karen Meyer             | 32  | 99.14 | 20 | RT |
| 82467 | <i>Ribes speciosum</i>              | Ribes           | speciosum      | Grossulariaceae  | Fuchsia-flowered gooseberry                                       | LF-ST-FL | CA | Andrew Keith Townesmith | 715 | 94.44 | 20 | RT |
| 82468 | <i>Salvia spathacea</i>             | Salvia          | spathacea      | Lamiaceae        | Pitcher or hummingbird sage                                       | ST       | CA | Tracy Scott             | 159 | 95.07 | 20 | RT |
| 82469 | <i>Elymus glaucus</i>               | Elymus          | glaucus        | Poaceae          | Blue wild rye                                                     | FR       | CA | Andrew Keith Townesmith | 723 | NA    | 20 |    |
| 82470 | <i>Verbesina cf. chapmanii</i>      | Verbesina       | cf. chapmanii  | Asteraceae       | Chapman's crownbeard                                              | ST       | FL | Andrew Keith Townesmith | 730 | NA    | 20 |    |
| 82471 | <i>Pinus palustris</i>              | Pinus           | palustris      | Pinaceae         | Pitch pine                                                        | ST       | FL | Karen Meyer             | 37  | NA    | 20 |    |
| 82472 | <i>Pteridium aquilinum</i>          | Pteridium       | aquilinum      | Dennstaedtiaceae | Bracken                                                           | LF       | FL | Karen Meyer             | 38  | NA    | 20 |    |
| 82473 | <i>Woodwardia virginica</i>         | Woodwardia      | virginica      | Blechnaceae      | Virginia chainfern                                                | LF-ST    | FL | Karen Meyer             | 39  | NA    | 20 |    |
| 82474 | <i>Orontium aquaticum</i>           | Orontium        | aquaticum      | Araceae          | Golden club                                                       | LF       | FL | Karen Meyer             | 41  | 22.13 | 20 |    |
| 82475 | <i>Orontium aquaticum</i>           | Orontium        | aquaticum      | Araceae          | Golden club                                                       | FR       | FL | Karen Meyer             | 41  | 4.98  | 20 |    |
| 82476 | <i>Leucothoe racemosa</i>           | Leucothoe       | racemosa       | Ericaceae        | Swamp doghobble                                                   | LF       | FL | Andrew Keith Townesmith | 732 | 8.18  | 20 |    |
| 82477 | <i>Hypericum crux-andreae</i>       | Hypericum       | crux-andreae   | Hypericaceae     | St. Peterswort                                                    | PX       | FL | Karen Meyer             | 48  | 73.08 | 20 |    |

|       |                                  |               |               |                  |                                                                       |       |    |                         |      |        |    |    |
|-------|----------------------------------|---------------|---------------|------------------|-----------------------------------------------------------------------|-------|----|-------------------------|------|--------|----|----|
| 82478 | <i>Osmunda regalis</i>           | Osmunda       | regalis       | Osmundaceae      | Royal fern                                                            | LF-ST | FL | Karen Meyer             | 51   | 11.30  | 20 |    |
| 82479 | <i>Vaccinium stamineum</i>       | Vaccinium     | stamineum     | Ericaceae        | Deerberry                                                             | LF-ST | FL | Karen Meyer             | 55   | NA     | 20 |    |
| 82480 | <i>Smilax walterii</i>           | Smilax        | walterii      | Smilacaceae      | Red-berried or coral greenbrier                                       | LF-ST | FL | Andrew Keith Townesmith | 743  | NA     | 20 |    |
| 82481 | <i>Sagittaria lancifolia</i>     | Sagittaria    | lancifolia    | Alismataceae     | Arrow head                                                            | LF    | FL | Karen Meyer             | 62   | 76.23  | 20 |    |
| 82482 | <i>Hydrocotyle ranunculoides</i> | Hydrocotyle   | ranunculoides | Apiaceae         | Water or floating pennywort                                           | P     | FL | Andrew Keith Townesmith | 745  | 19.61  | 20 |    |
| 82483 | <i>Callicarpa americana</i>      | Callicarpa    | americana     | Lamiaceae        | American beautyberry                                                  | ST    | FL | Andrew Keith Townesmith | 746  | 20.27  | 20 |    |
| 82484 | <i>Sabal minor</i>               | Sabal         | minor         | Arecaceae        | Bush palmetto                                                         | FL    | FL | Andrew Keith Townesmith | 748  | 97.01  | 20 | RT |
| 82485 | <i>Persea borbonia</i>           | Persea        | borbonia      | Lauraceae        | Red bay                                                               | LF    | FL | Andrew Keith Townesmith | 751  | 60.83  | 20 |    |
| 82486 | <i>Gaylussacia frondosa</i>      | Gaylussacia   | frondosa      | Ericaceae        | Dangleberry                                                           | ST    | FL | Karen Meyer             | 67   | 12.13  | 20 |    |
| 83278 | <i>Osmunda regalis</i>           | Osmunda       | regalis       | Osmundaceae      | Royal fern                                                            | RT    | FL | Karen Meyer             | 51   | 1.06   | 20 |    |
| 83279 | <i>Quercus inopina</i>           | Quercus       | inopina       | Fagaceae         | Sandhill oak                                                          | ST    | FL | Andrew Keith Townesmith | 756  | 9.76   | 20 |    |
| 83280 | <i>Quercus geminata</i>          | Quercus       | geminata      | Fagaceae         | Sand live oak                                                         | LF    | FL | Andrew Keith Townesmith | 757  | 97.05  | 20 | RT |
| 83281 | <i>Pterocaulon pycnostachyum</i> | Pterocaulon   | pycnostachyum | Asteraceae       | Dense-spike blackroot                                                 | ST    | FL | Karen Meyer             | 60   | 5.42   | 20 |    |
| 83282 | <i>Asimina reticulata</i>        | Asimina       | reticulata    | Annonaceae       | Netted (reticulated) papaw                                            | LF    | FL | Karen Meyer             | 70   | 5.37   | 20 |    |
| 83283 | <i>Cladina cf. evansii</i>       | Cladina       | cf. evansii   | Cladoniaceae     | Reindeer Lichen                                                       | P     | FL | Andrew Keith Townesmith | 777  | 5.11   | 20 |    |
| 83284 | <i>Pinus serotina</i>            | Pinus         | serotina      | Pinaceae         | Pond pine                                                             | BK    | FL | Karen Meyer             | 102  | 91.36  | 20 | RT |
| 83285 | <i>Sabatia calycina</i>          | Sabatia       | calycina      | Gentianaceae     | Coastal rose gentian                                                  | PX    | FL | Andrew Keith Townesmith | 783  | 13.23  | 20 |    |
| 83286 | <i>Rumex verticillata</i>        | Rumex         | verticillatus | Polygonaceae     | Swamp dock                                                            | LF    | FL | Andrew Keith Townesmith | 784  | NA     | 20 |    |
| 83287 | <i>Ptilimnium capillaceum</i>    | Ptilimnium    | capillaceum   | Apiaceae         | Herbwilliam                                                           | P     | FL | Andrew Keith Townesmith | 787  | 0.43   | 20 |    |
| 83288 | <i>Vitis cinerea</i>             | Vitis         | cinerea       | Vitaceae         | Sweet winter grape                                                    | FL    | FL | Andrew Keith Townesmith | 750  | NA     | 20 |    |
| 83289 | <i>Eriocaulon anceps</i>         | Eriocaulon    | anceps        | Eriocaulaceae    | Whitehead bogbutton                                                   | P     | FL | Andrew Keith Townesmith | 788  | 95.91  | 20 | RT |
| 83290 | <i>Chapmannia floridana</i>      | Chapmannia    | floridana     | Fabaceae         | Florida alicia                                                        | P     | FL | Karen Meyer             | 105  | 7.49   | 20 |    |
| 83291 | <i>Salix caroliniana</i>         | Salix         | caroliniana   | Salicaceae       | Coastal plain willow                                                  | LF    | FL | Andrew Keith Townesmith | 797  | 90.16  | 20 | RT |
| 83292 | <i>Rhynchospora colorata</i>     | Rhynchospora  | colorata      | Cyperaceae       | Starrush whitetop                                                     | P     | FL | Karen Meyer             | 109  | 9.85   | 20 |    |
| 83293 | <i>Polygala lutea</i>            | Polygala      | lutea         | Polygalaceae     | Orange milkwort                                                       | P     | FL | Andrew Keith Townesmith | 798  | 13.86  | 20 |    |
| 83294 | <i>Berlandiera subcaulis</i>     | Berlandiera   | subcaulis     | Asteraceae       | Florida greeneyes                                                     | LF    | FL | Andrew Keith Townesmith | 799  | 91.28  | 20 | RT |
| 83295 | <i>Mayaca fluviatilis</i>        | Mayaca        | fluviatilis   | Mayacaceae       | Stream bogmoss                                                        | P     | FL | Andrew Keith Townesmith | 801  | 65.53  | 20 |    |
| 83296 | <i>Hydrocotyle umbellata</i>     | Hydrocotyle   | umbellata     | Apiaceae         | Manyflower marsh pennywort                                            | LF-ST | FL | Andrew Keith Townesmith | 802  | 50.81  | 20 |    |
| 83297 | <i>Lotus purshianus</i>          | Lotus         | purshianus    | Fabaceae         | Spanish lotus                                                         | PX    | CA | Karen Meyer             | 166  | 3.42   | 20 |    |
| 83298 | <i>Cupressus lawsoniana</i>      | Cupressus     | lawsoniana    | Cupressaceae     | Lawson's cypress                                                      | LF    | CA | Andrew Keith Townesmith | 864  | 76.41  | 20 |    |
| 83299 | <i>Allium validum</i>            | Allium        | validum       | Liliaceae        | Swamp onion                                                           | PX    | CA | Andrew Keith Townesmith | 876  | 5.13   | 20 |    |
| 83300 | <i>Gentiana calycosa</i>         | Gentiana      | calycosa      | Gentianaceae     | Gentian                                                               | PX    | CA | Andrew Keith Townesmith | 878  | 8.43   | 20 |    |
| 83301 | <i>Eriophorum criniger</i>       | Eriophorum    | crinigerum    | Cyperaceae       | Fringed cottongrass                                                   | PX    | CA | Andrew Keith Townesmith | 883  | 11.28  | 20 |    |
| 83302 | <i>Darlingtonia californica</i>  | Darlingtonia  | californica   | Sarraceniaceae   | California pitcher plant, cobra lily, cobra plant (carnivorous plant) | LF    | CA | Andrew Keith Townesmith | 888  | 3.61   | 20 |    |
| 83303 | <i>Orthocarpus cuspidatus</i>    | Orthocarpus   | cuspidatus    | Scrophulariaceae | Toothed owl's-clover                                                  | P     | CA | Karen Meyer             | 187  | 2.31   | 20 |    |
| 83304 | <i>Salix lemmonii</i>            | Salix         | lemmonii      | Salicaceae       | Lemmon's willow                                                       | ST    | CA | Karen Meyer             | 188  | 26.63  | 20 |    |
| 83305 | <i>Acer negundo</i>              | Acer          | negundo       | Sapindaceae      | Box elder                                                             | FR    | CA | Andrew Keith Townesmith | 892  | 6.00   | 20 |    |
| 83306 | <i>Cornus glabrata</i>           | Cornus        | glabrata      | Cornaceae        | Brown dogwood, western cornel                                         | LF    | CA | Andrew Keith Townesmith | 893  | 15.01  | 20 |    |
| 83307 | <i>Eriogonum nudum</i>           | Eriogonum     | nudum         | Polygonaceae     | Naked buckwheat                                                       | ST-FL | CA | Karen Meyer             | 189  | 98.83  | 20 | RT |
| 83308 | <i>Ceanothus integerrimus</i>    | Ceanothus     | integerrimus  | Rhamnaceae       | Deer brush                                                            | FR    | CA | Andrew Keith Townesmith | 853  | 13.93  | 20 |    |
| 83309 | <i>Arceuthobium occidentale</i>  | Arceuthobium  | occidentale   | Viscaceae        | Gray pine dwarf mistletoe                                             | P     | CA | Karen Meyer             | 192  | 97.32  | 20 | RT |
| 83310 | <i>Rhamnus tomentella</i>        | Rhamnus       | tomentella    | Rhamnaceae       | Mountain coffeeberry                                                  | ST    | CA | Karen Meyer             | 193  | 0.46   | 20 |    |
| 83311 | <i>Cinnamomum verum</i>          | Cinnamomum    | verum         | Lauraceae        | Cinnamon                                                              | LF    | HI | Andrew Keith Townesmith | 1017 | 1.64   | 20 |    |
| 83312 | <i>Musa velutina</i>             | Musa          | velutina      | Musaceae         | Pink banana                                                           | LF    | HI | Andrew Keith Townesmith | 1018 | 18.11  | 20 |    |
| 83313 | <i>Angiopteris evecta</i>        | Angiopteris   | evecta        | Marattiaceae     | Oriental vessel fern                                                  | LF    | HI | Andrew Keith Townesmith | 1019 | 2.98   | 20 |    |
| 83314 | <i>Impatiens walleriana</i>      | Impatiens     | walleriana    | Balsaminaceae    | Busy Lizzy                                                            | LF    | HI | Andrew Keith Townesmith | 1020 | 6.03   | 20 |    |
| 83315 | <i>Musa velutina</i>             | Musa          | velutina      | Musaceae         | Pink banana                                                           | FL    | HI | Andrew Keith Townesmith | 1018 | 6.24   | 20 |    |
| 83316 | <i>Araucaria cunninghamii</i>    | Araucaria     | cunninghamii  | Araucariaceae    | Hoop pine                                                             | LF    | HI | Karen Meyer             | 303  | 11.54  | 20 |    |
| 83317 | <i>Spathiphyllum wallisii</i>    | Spathiphyllum | wallisii      | Araceae          | Peace lily                                                            | FL    | HI | Karen Meyer             | 304  | 101.28 | 20 | RT |
| 83318 | <i>Spathiphyllum wallisii</i>    | Spathiphyllum | wallisii      | Araceae          | Peace lily                                                            | FL    | HI | Karen Meyer             | 304  | -0.72  | 20 |    |
| 83319 | <i>Syzygium malaccense</i>       | Syzygium      | malaccense    | Myrtaceae        | Malay apple                                                           | LF    | HI | Karen Meyer             | 305  | 98.62  | 20 | RT |
| 83320 | <i>Pleiostachya pruinosa</i>     | Pleiostachya  | pruinosa      | Marantaceae      | Platanillo, prayer plant                                              | LF    | HI | Karen Meyer             | 307  | NA     | 20 |    |
| 83321 | <i>Cecropia obtusifolia</i>      | Cecropia      | obtusifolia   | Urticaceae       | Trumpet tree                                                          | LF    | HI | Karen Meyer             | 309  | 8.85   | 20 |    |
| 83322 | <i>Musa ornata</i>               | Musa          | ornata        | Musaceae         | Flowering or ornamental banana                                        | FL    | HI | Karen Meyer             | 306  | 4.71   | 20 |    |
| 83323 | <i>Elaeocarpus angustifolius</i> | Elaeocarpus   | angustifolius | Elaeocarpaceae   | Blue marble tree, blue fig, blue quandong                             | LF    | HI | Andrew Keith Townesmith | 1021 | 98.08  | 20 | RT |
| 83324 | <i>Ficus drupacea</i>            | Ficus         | drupacea      | Moraceae         | Brown wooly fig                                                       | LF    | HI | Andrew Keith Townesmith | 1023 | 13.30  | 20 |    |
| 83325 | <i>Begonia hirtella</i>          | Begonia       | hirtella      | Begoniaceae      | Brazilian begonia                                                     | P     | HI | Andrew Keith Townesmith | 1025 | 16.92  | 20 |    |
| 83326 | <i>Cinnamomum burmannii</i>      | Cinnamomum    | burmannii     | Lauraceae        | Padang cassia                                                         | LF    | HI | Andrew Keith Townesmith | 1026 | 4.54   | 20 |    |
| 83327 | <i>Tabebuia rosea</i>            | Tabebuia      | rosea         | Bignoniaceae     | Roble de Sabana, trumpet tree                                         | LF    | HI | Karen Meyer             | 310  | 3.25   | 20 |    |
| 83328 | <i>Microsorium scolopendria</i>  | Microsorium   | scolopendria  | Polypodiaceae    | Embossed fern                                                         | LF    | HI | Karen Meyer             | 311  | 1.44   | 20 |    |
| 83329 | <i>Syzygium aqueum</i>           | Syzygium      | aqueum        | Myrtaceae        | Water cherry, watery rose apple, Lau Lau                              | LF    | HI | Karen Meyer             | 312  | 99.95  | 20 | RT |

|       |                                  |                |                |                  |                                                    |       |    |                         |      |        |    |    |
|-------|----------------------------------|----------------|----------------|------------------|----------------------------------------------------|-------|----|-------------------------|------|--------|----|----|
| 83330 | <i>Spathiphyllum cannifolium</i> | Spathiphyllum  | cannifolium    | Araceae          | Peace lily                                         | LF    | HI | Karen Meyer             | 313  | 6.39   | 20 |    |
| 83331 | <i>Spathiphyllum cannifolium</i> | Spathiphyllum  | cannifolium    | Araceae          | Peace lily                                         | FL    | HI | Karen Meyer             | 313  | 7.69   | 20 |    |
| 83332 | <i>Clerodendrum macrostegium</i> | Clerodendrum   | macrostegium   | Lamiaceae        | Velvetleaf glorybower                              | LF    | HI | Karen Meyer             | 314  | 88.80  | 20 |    |
| 83334 | <i>Medinilla magnifica</i>       | Medinilla      | magnifica      | Melastomataceae  | Chandelier tree                                    | FL-FR | HI | Karen Meyer             | 318  | 97.25  | 20 | RT |
| 83335 | <i>Ficus trigonata</i>           | Ficus          | trigonata      | Moraceae         | Jaguey blanco, wild fig                            | LF    | HI | Karen Meyer             | 319  | 99.81  | 20 | RT |
| 83336 | <i>Cordyline fruticosa</i>       | Cordyline      | fruticosa      | Asparagaceae     | Cabbage palm, good luck plant, palm lily, ti plant | LF    | HI | Andrew Keith Townesmith | 1028 | 2.55   | 20 |    |
| 83337 | <i>Ardisia crenata</i>           | Ardisia        | crenata        | Myrsinaceae      | Coralberry                                         | LF    | HI | Andrew Keith Townesmith | 1032 | 77.99  | 20 |    |
| 83338 | <i>Christella dentata</i>        | Christella     | dentata        | Thelypteridaceae | Downy wood fern                                    | PX    | HI | Karen Meyer             | 322  | 7.18   | 20 |    |
| 83339 | <i>Macaranga mappa</i>           | Macaranga      | mappa          | Euphorbiaceae    | Pengua                                             | LF    | HI | Karen Meyer             | 323  | 88.98  | 20 |    |
| 83340 | <i>Erythrina poeppigiana</i>     | Erythrina      | poeppigiana    | Fabaceae         | Mountain immortelle                                | LF    | HI | Karen Meyer             | 324  | 13.17  | 20 |    |
| 83341 | <i>Costus productus</i>          | Costus         | productus      | Costaceae        | Productus                                          | FL    | HI | Karen Meyer             | 326  | 14.88  | 20 |    |
| 83342 | <i>Zingiber spectabile</i>       | Zingiber       | spectabile     | Zingiberaceae    | Beehive plant                                      | FL    | HI | Karen Meyer             | 327  | NA     | 20 |    |
| 83343 | <i>Alpinia intermedia</i>        | Alpinia        | intermedia     | Zingiberaceae    | Variegated ginger                                  | LF    | HI | Karen Meyer             | 329  | 89.51  | 20 |    |
| 83344 | <i>Pleuranthodium hellwigii</i>  | Pleuranthodium | hellwigii      | Zingiberaceae    | NULL                                               | LF    | HI | Karen Meyer             | 332  | 53.40  | 20 |    |
| 83345 | <i>Eucalyptus citriodora</i>     | Eucalyptus     | citriodora     | Myrtaceae        | Lemon-scented gum                                  | LF    | HI | Andrew Keith Townesmith | 1034 | 98.52  | 20 | RT |
| 83346 | <i>Psilotum nudum</i>            | Psilotum       | nudum          | Psilotaceae      | Whiskfern                                          | PX    | HI | Andrew Keith Townesmith | 1036 | 12.53  | 20 |    |
| 83347 | <i>Schefflera actinophylla</i>   | Schefflera     | actinophylla   | Araliaceae       | Umbrella tree, octopus tree, amate                 | LF    | HI | Andrew Keith Townesmith | 1037 | 100.01 | 20 | RT |
| 83348 | <i>Aglaonema cf. modestum</i>    | Aglaonema      | cf. modestum   | Araceae          | Chinese evergreen                                  | LF    | HI | Andrew Keith Townesmith | 1038 | 9.88   | 20 |    |
| 83349 | <i>Roystonea cf. oleracea</i>    | Roystonea      | cf. oleracea   | Arecaceae        | Caribbean royal palm, imperial palm, cabbage palm  | LF    | HI | Andrew Keith Townesmith | 1041 | 42.20  | 20 |    |
| 83350 | <i>Dillenia indica</i>           | Dillenia       | indica         | Dilleniaceae     | Chulta, elephant apple                             | LF    | HI | Karen Meyer             | 308  | NA     | 20 |    |
| 83351 | <i>Eucalyptus citriodora</i>     | Eucalyptus     | citriodora     | Myrtaceae        | Lemon-scented gum                                  | BK    | HI | Andrew Keith Townesmith | 1034 | 96.17  | 20 | RT |
| 83352 | <i>Falcataria moluccana</i>      | Falcataria     | moluccana      | Fabaceae         | Peacocksplume                                      | LF    | HI | Karen Meyer             | 342  | 60.39  | 20 |    |
| 83353 | <i>Passiflora auferosa</i>       | Passiflora     | suberosa       | Passifloraceae   | Corksystem passionflower                           | LF-ST | HI | Andrew Keith Townesmith | 1048 | 3.33   | 20 |    |
| 83354 | <i>Mimosa pudica</i>             | Mimosa         | pudica         | Fabaceae         | Sensitive plant                                    | P     | HI | Karen Meyer             | 343  | 52.10  | 20 |    |
| 83355 | <i>Kyllinga memorialis</i>       | Kyllinga       | memoralis      | Cyperaceae       | Whitehead spikesedge                               | P     | HI | Karen Meyer             | 344  | 64.01  | 20 |    |
| 83356 | <i>Casuarina equisetifolia</i>   | Casuarina      | equisetifolia  | Casuarinaceae    | Agohe she-oak, filao tree                          | LF    | HI | Andrew Keith Townesmith | 1051 | 41.58  | 20 |    |
| 83357 | <i>Ardisia elliptica</i>         | Ardisia        | elliptica      | Myrsinaceae      | Shoebuttton                                        | LF    | HI | Karen Meyer             | 385  | 101.33 | 20 | RT |
| 83358 | <i>Nymphaea odorata</i>          | Nymphaea       | odorata        | Nymphaeaceae     | Fragrant water lily                                | FL    | WI | Karen Meyer             | 861  | 97.70  | 20 | RT |
| 83359 | <i>Echinocystis lobata</i>       | Echinocystis   | lobata         | Cucurbitaceae    | Wild cucumber                                      | FR    | WI | Karen Meyer             | 862  | NA     | 20 |    |
| 83360 | <i>Acer rubrum</i>               | Acer           | rubrum         | Sapindaceae      | Red maple                                          | LF    | WI | Karen Meyer             | 863  | 93.93  | 20 | RT |
| 83361 | <i>Acer rubrum</i>               | Acer           | rubrum         | Sapindaceae      | Red maple                                          | ST    | WI | Karen Meyer             | 863  | 93.35  | 20 | RT |
| 83362 | <i>Agrimonia gryposepala</i>     | Agrimonia      | gryposepala    | Rosaceae         | Tall, hairy agrimony                               | LF-FR | WI | Karen Meyer             | 864  | 11.72  | 20 |    |
| 83363 | <i>Agrimonia gryposepala</i>     | Agrimonia      | gryposepala    | Rosaceae         | Tall, hairy agrimony                               | ST    | WI | Karen Meyer             | 864  | 8.65   | 20 |    |
| 83364 | <i>Verbesina virginica</i>       | Verbesina      | virginica      | Asteraceae       | White crownbeard                                   | LF-FL | MO | Karen Meyer             | 865  | 100.21 | 20 | RT |
| 83365 | <i>Verbesina virginica</i>       | Verbesina      | virginica      | Asteraceae       | White crownbeard                                   | ST    | MO | Karen Meyer             | 865  | 29.39  | 20 |    |
| 83938 | <i>Chamaecrista nictitans</i>    | Chamaecrista   | nictitans      | Fabaceae         | Sensitive partridge pea                            | P     | HI | Andrew Keith Townesmith | 1094 | 90.68  | 20 | RT |
| 83939 | <i>Pinus ponderosa</i>           | Pinus          | ponderosa      | Pinaceae         | Ponderosa pine                                     | BK    | NM | John Stone              | 3799 | 12.78  | 20 |    |
| 83940 | <i>Acer glabrum</i>              | Acer           | glabrum        | Sapindaceae      | Rock maple                                         | ST    | CO | John Stone              | 3826 | 25.96  | 20 |    |
| 83941 | <i>Betula fontinalis</i>         | Betula         | fontinalis     | Betulaceae       | Water birch                                        | ST    | CO | John Stone              | 3839 | 14.42  | 20 |    |
| 83942 | <i>Lithospermum incisum</i>      | Lithospermum   | incisum        | Boraginaceae     | Gromwell                                           | P     | CO | John Stone              | 3843 | 9.20   | 20 |    |
| 83943 | <i>Prunus virginiana</i>         | Prunus         | virginiana     | Rosaceae         | Chokecherry                                        | ST    | CO | John Stone              | 3844 | 6.33   | 20 |    |
| 83944 | <i>Geranium richardsonii</i>     | Geranium       | richardsonii   | Geraniaceae      | Richardson's geranium                              | P     | CO | Greg Gust               | 163  | 98.36  | 20 | RT |
| 83945 | <i>Heracleum sphondylium</i>     | Heracleum      | sphondylium    | Apiaceae         | Common hogweed                                     | P     | CO | Greg Gust               | 165  | 88.50  | 20 |    |
| 83946 | <i>Sedum lanceolatum</i>         | Sedum          | lanceolatum    | Crassulaceae     | Spearleaf stonecrop                                | P     | CO | John Stone              | 3850 | 0.77   | 20 |    |
| 83947 | <i>Arnica cordifolia</i>         | Arnica         | cordifolia     | Asteraceae       | Heartleaf arnica                                   | P     | CO | John Stone              | 3851 | 95.13  | 20 | RT |
| 83948 | <i>Collomia linearis</i>         | Collomia       | linearis       | Polemoniaceae    | Tiny trumpet                                       | P     | CO | John Stone              | 3866 | 4.16   | 20 |    |
| 83949 | <i>Leccinum insigne</i>          | Leccinum       | insigne        | Boletaceae       | Orange cap, scaber stalk, Aspen bolete             | P     | CO | John Stone              | 3871 | NA     | 20 |    |
| 83950 | <i>Berberis nervosa</i>          | Berberis       | nervosa        | Berberidaceae    | Cascade barberry                                   | RT    | WA | Allison Colwell         | 122  | 38.56  | 20 |    |
| 83951 | <i>Trifolium parryi</i>          | Trifolium      | parryi         | Fabaceae         | Parry's clover                                     | P     | CO | John Stone              | 3892 | 19.43  | 20 |    |
| 83952 | <i>Pueraria lobata</i>           | Pueraria       | lobata         | Fabaceae         | Kudzu                                              | LF-ST | NC | John Stone              | 1554 | 28.43  | 20 |    |
| 83953 | <i>Ribes inerne</i>              | Ribes          | inerne         | Grossulariaceae  | Whitestem gooseberry                               | PX    | CO | Greg Gust               | 214  | 70.15  | 20 |    |
| 83954 | <i>Pinus aristata</i>            | Pinus          | aristata       | Pinaceae         | Bristle-cone pine                                  | P     | CO | John Stone              | 3898 | 99.39  | 20 | RT |
| 83955 | <i>Pedicularis bracteosa</i>     | Pedicularis    | bracteosa      | Orobanchaceae    | Bracted lousewort                                  | P     | CO | Greg Gust               | 178  | 3.11   | 20 |    |
| 83956 | <i>Vaccinium scoparium</i>       | Vaccinium      | scoparium      | Ericaceae        | Grouseberry                                        | P     | CO | Greg Gust               | 179  | 93.32  | 20 | RT |
| 83957 | <i>Arnica mollis</i>             | Arnica         | mollis         | Asteraceae       | Arnica                                             | P     | CO | John Stone              | 3899 | 91.41  | 20 | RT |
| 83958 | <i>Limnorchis dilatata</i>       | Limnorchis     | dilatata       | Orchidaceae      | White bog-orchid                                   | PX    | CO | Greg Gust               | 184  | 17.81  | 20 |    |
| 83959 | <i>Saxifraga odontoloma</i>      | Saxifraga      | odontoloma     | Saxifragaceae    | Brook saxifrage                                    | P     | CO | Greg Gust               | 188  | 98.69  | 20 | RT |
| 83960 | <i>Carex cf. lanuginosa</i>      | Carex          | cf. lanuginosa | Cyperaceae       | Woolly sedge                                       | P     | CO | Greg Gust               | 194  | 9.74   | 20 |    |
| 83961 | <i>Ribes montigenum</i>          | Ribes          | montigenum     | Grossulariaceae  | Gooseberry-currant                                 | PX    | CO | Greg Gust               | 195  | 97.69  | 20 | RT |
| 83962 | <i>Carex nebrascensis</i>        | Carex          | nebrascensis   | Cyperaceae       | Nebraska sedge                                     | P     | NA | Greg Gust               | 199  | NA     | 20 |    |
| 83963 | <i>Rubus deliciosus</i>          | Rubus          | deliciosus     | Rosaceae         | Rocky Mountain raspberry                           | PX    | CO | Greg Gust               | 215  | 96.12  | 20 | RT |
| 83964 | <i>Lycopodium lucidulum</i>      | Lycopodium     | lucidulum      | Lycopodiaceae    | Shining club moss                                  | P     | NC | John Stone              | 1682 | 4.93   | 20 |    |

|       |                                    |                |                |                  |                                      |       |    |            |      |       |    |    |
|-------|------------------------------------|----------------|----------------|------------------|--------------------------------------|-------|----|------------|------|-------|----|----|
| 83965 | <i>Artemisia cana</i>              | Artemisia      | cana           | Asteraceae       | Wormwood                             | PX    | CO | Greg Gust  | 203  | 10.38 | 20 |    |
| 83966 | <i>Carex microptera</i>            | Carex          | microptera     | Cyperaceae       | Smallwing sedge                      | P     | CO | Greg Gust  | 204  | 6.82  | 20 |    |
| 83967 | <i>Phacelia heterophylla</i>       | Phacelia       | heterophylla   | Hydrophyllaceae  | Varileaf phacelia                    | P     | CO | John Stone | 3900 | 14.13 | 20 |    |
| 83968 | <i>Delphinium glaucum</i>          | Delphinium     | glaucum        | Ranunculaceae    | Giant larkspur                       | P     | CO | John Stone | 3902 | 8.57  | 20 |    |
| 83969 | <i>Aconitum columbianum</i>        | Aconitum       | columbianum    | Ranunculaceae    | Columbian monkshood                  | P     | CO | John Stone | 3903 | 35.39 | 20 |    |
| 83970 | <i>Arctostaphylos uva-ursi</i>     | Arctostaphylos | uva-ursi       | Ericaceae        | Bearberry                            | LF    | CO | John Stone | 3904 | 85.19 | 20 |    |
| 83971 | <i>Linum lewisii</i>               | Linum          | lewisii        | Linaceae         | Lewis flax                           | P     | CO | John Stone | 3905 | 10.33 | 20 |    |
| 83972 | <i>Ribes cf. leptanthum</i>        | Ribes          | cf. leptanthum | Grossulariaceae  | Trumpet gooseberry                   | PX    | CO | John Stone | 3907 | 96.34 | 20 | RT |
| 83973 | <i>Castilleja rhexiifolia</i>      | Castilleja     | rhexiifolia    | Scrophulariaceae | Splitleaf indian paintbrush          | P     | CO | John Stone | 3911 | 7.95  | 20 |    |
| 83974 | <i>Vaccinium myrtillus</i>         | Vaccinium      | myrtillus      | Ericaceae        | Bilberry                             | P     | CO | John Stone | 3912 | 82.68 | 20 |    |
| 83975 | <i>Zigadenus elegans</i>           | Zigadenus      | elegans        | Liliaceae        | Mountain death-camas                 | P     | CO | John Stone | 3914 | 12.36 | 20 |    |
| 83976 | <i>Stachys palustris</i>           | Stachys        | palustris      | Lamiaceae        | Marsh woundwort                      | P     | CO | Greg Gust  | 208  | 11.05 | 20 |    |
| 83977 | <i>Grindelia squarrosa</i>         | Grindelia      | squarrosa      | Asteraceae       | Rosin weed                           | P     | CO | Greg Gust  | 210  | 15.73 | 20 |    |
| 83978 | <i>Conium maculatum</i>            | Conium         | maculatum      | Apiaceae         | Hemlock                              | ST    | CO | Greg Gust  | 211  | NA    | 20 |    |
| 83979 | <i>Prunus virginiana</i>           | Amelanchier    | alnifolia      | Rosaceae         | Saskatoon                            | PX    | CO | Greg Gust  | 216  | 6.22  | 20 |    |
| 83980 | <i>Berteroa incana</i>             | Berteroa       | incana         | Brassicaceae     | Hoary alyssum                        | P     | CO | Greg Gust  | 217  | NA    | 20 |    |
| 83981 | <i>Convolvulus arvensis</i>        | Convolvulus    | arvensis       | Convolvulaceae   | Field bindweed                       | P     | CO | Greg Gust  | 218  | 98.45 | 20 | RT |
| 83982 | <i>Phalaris arundinacea</i>        | Phalaris       | arundinacea    | Poaceae          | Canary grass                         | P     | CO | John Stone | 3916 | 5.38  | 20 |    |
| 83983 | <i>Medicago sativa</i>             | Medicago       | sativa         | Fabaceae         | Alfalfa                              | PX    | CO | John Stone | 3917 | 5.87  | 20 |    |
| 83984 | <i>Agropyron desetorum</i>         | Agropyron      | desertorum     | Poaceae          | Desert wheatgrass                    | P     | CO | John Stone | 3918 | 13.45 | 20 |    |
| 83985 | <i>Yucca glauca</i>                | Yucca          | glauca         | Agavaceae        | Soapweed                             | LF    | CO | John Stone | 3920 | 28.18 | 20 |    |
| 83986 | <i>Yucca glauca</i>                | Yucca          | glauca         | Agavaceae        | Soapweed                             | ST    | CO | John Stone | 3920 | 99.54 | 20 | RT |
| 83987 | <i>Yucca glauca</i>                | Yucca          | glauca         | Agavaceae        | Soapweed                             | FR    | CO | John Stone | 3920 | 33.37 | 20 |    |
| 83988 | <i>Opuntia phaeacantha</i>         | Opuntia        | phaeacantha    | Cactaceae        | Bastard fig                          | PX    | CO | John Stone | 3925 | 1.06  | 20 |    |
| 83989 | <i>Elymus canadensis</i>           | Elymus         | canadensis     | Poaceae          | Canadian wild rye                    | PX    | CO | John Stone | 3926 | 2.97  | 20 |    |
| 83990 | <i>Cleome serrulata</i>            | Cleome         | serrulata      | Capparaceae      | Rocky Mountain beeplant              | PX    | CO | John Stone | 3927 | 4.53  | 20 |    |
| 83991 | <i>Bahia oppositifolia</i>         | Bahia          | oppositifolia  | Asteraceae       | Oppositeleaf bahia                   | P     | CO | John Stone | 3928 | 99.77 | 20 | RT |
| 83992 | <i>Thelesperma gracile</i>         | Thelesperma    | gracile        | Asteraceae       | Greenthread                          | P     | CO | John Stone | 3930 | 13.61 | 20 |    |
| 83993 | <i>Asclepias hallii</i>            | Asclepias      | hallii         | Asclepiadaceae   | Purple silkweed                      | ST    | CO | John Stone | 3932 | 13.75 | 20 |    |
| 83994 | <i>Asclepias hallii</i>            | Asclepias      | hallii         | Asclepiadaceae   | Purple silkweed                      | LF-FL | CO | John Stone | 3932 | 87.98 | 20 |    |
| 83995 | <i>Senecio spartioides</i>         | Senecio        | spartioides    | Asteraceae       | Ragwort/groundsel                    | PX    | CO | John Stone | 3933 | 99.56 | 20 | RT |
| 83996 | <i>Pyrolaria pubera</i>            | Pyrolaria      | pubera         | Santalaceae      | Oil nut                              | LF    | NC | John Stone | 3934 | 8.76  | 20 |    |
| 83997 | <i>Pyrolaria pubera</i>            | Pyrolaria      | pubera         | Santalaceae      | Oil nut                              | ST    | NC | John Stone | 3934 | 4.88  | 20 |    |
| 83998 | <i>Eupatorium rugosum</i>          | Eupatorium     | rugosum        | Asteraceae       | Thoroughwort                         | P     | NC | John Stone | 3935 | 42.14 | 20 |    |
| 83999 | <i>Erigeron annuus</i>             | Erigeron       | annuus         | Asteraceae       | Annual fleabane                      | P     | NC | John Stone | 3936 | 79.32 | 20 |    |
| 84000 | <i>Helianthus microcephalus</i>    | Helianthus     | microcephalus  | Asteraceae       | Small woodland sunflower             | P     | NC | John Stone | 3937 | 52.78 | 20 |    |
| 84001 | <i>Hydrangea arborescens</i>       | Hydrangea      | arborescens    | Hydrangeaceae    | Seven barks                          | PX    | NC | John Stone | 3939 | 40.06 | 20 |    |
| 84002 | <i>Magnolia fraseri</i>            | Magnolia       | fraseri        | Magnoliaceae     | Mountain magnolia                    | LF    | NC | John Stone | 3940 | 3.38  | 20 |    |
| 84003 | <i>Magnolia fraseri</i>            | Magnolia       | fraseri        | Magnoliaceae     | Mountain magnolia                    | ST    | NC | John Stone | 3940 | 98.89 | 20 | RT |
| 84004 | <i>Magnolia fraseri</i>            | Magnolia       | fraseri        | Magnoliaceae     | Mountain magnolia                    | FL    | NC | John Stone | 3940 | 38.92 | 20 |    |
| 84005 | <i>Asclepias exaltata</i>          | Asclepias      | exaltata       | Asclepiadaceae   | Poke milkweed                        | LF-ST | NC | John Stone | 3941 | 9.53  | 20 |    |
| 84006 | <i>Asclepias exaltata</i>          | Asclepias      | exaltata       | Asclepiadaceae   | Poke milkweed                        | FR    | NC | John Stone | 3941 | 99.66 | 20 | RT |
| 84007 | <i>Prunella vulgaris</i>           | Prunella       | vulgaris       | Lamiaceae        | Self-heal                            | PX    | NC | John Stone | 3942 | 11.37 | 20 |    |
| 84008 | <i>Rhododendron catawbiense</i>    | Rhododendron   | catawbiense    | Ericaceae        | Catawba rosebay                      | LF    | NC | John Stone | 3943 | 93.50 | 20 | RT |
| 84009 | <i>Rhododendron catawbiense</i>    | Rhododendron   | catawbiense    | Ericaceae        | Catawba rosebay                      | ST    | NC | John Stone | 3943 | 95.74 | 20 | RT |
| 84010 | <i>Rhododendron catawbiense</i>    | Rhododendron   | catawbiense    | Ericaceae        | Catawba rosebay                      | FR    | NC | John Stone | 3943 | 95.31 | 20 | RT |
| 84011 | <i>Kalmia latifolia</i>            | Kalmia         | latifolia      | Ericaceae        | Mountain laurel                      | LF-FR | NC | John Stone | 3944 | 36.56 | 20 |    |
| 84012 | <i>Gaylussacia ursina</i>          | Gaylussacia    | ursina         | Ericaceae        | Bear huckleberry                     | LF-FR | NC | John Stone | 3945 | 1.09  | 20 |    |
| 84013 | <i>Ilex ambigua</i>                | Ilex           | ambigua        | Aquifoliaceae    | Carolina holly                       | LF-FR | NC | John Stone | 3946 | 4.90  | 20 |    |
| 84014 | <i>Ilex ambigua</i>                | Ilex           | ambigua        | Aquifoliaceae    | Carolina holly                       | ST    | NC | John Stone | 3946 | 93.15 | 20 | RT |
| 84015 | <i>Collinsonia canadensis</i>      | Collinsonia    | canadensis     | Lamiaceae        | Canada horsebalm, richweed, heal-all | P     | NC | John Stone | 3947 | 15.32 | 20 |    |
| 84016 | <i>Campanula divaricata</i>        | Campanula      | divaricata     | Campanulaceae    | Small bonny bellflower               | P     | NC | John Stone | 3948 | 55.98 | 20 |    |
| 84017 | <i>Gaylussacia ursina</i>          | Gaylussacia    | ursina         | Ericaceae        | Bear huckleberry                     | ST    | NC | John Stone | 3945 | 65.14 | 20 |    |
| 84018 | <i>Actaea pachypoda</i>            | Actaea         | pachypoda      | Ranunculaceae    | White baneberry, doll's eyes         | P     | NC | John Stone | 3949 | 7.90  | 20 |    |
| 84019 | <i>Elaeagnus umbellata</i>         | Elaeagnus      | umbellata      | Elaeagnaceae     | Autumn olive                         | FR    | NC | John Stone | 3951 | NA    | 20 |    |
| 84020 | <i>Elaeagnus umbellata</i>         | Elaeagnus      | umbellata      | Elaeagnaceae     | Autumn olive                         | ST    | NC | John Stone | 3951 | 95.91 | 20 | RT |
| 84021 | <i>Elaeagnus umbellata</i>         | Elaeagnus      | umbellata      | Elaeagnaceae     | Autumn olive                         | LF    | NC | John Stone | 3951 | 27.69 | 20 |    |
| 84022 | <i>Tsuga canadensis</i>            | Tsuga          | canadensis     | Pinaceae         | Canadian hemlock                     | PX    | NC | John Stone | 3952 | 93.42 | 20 | RT |
| 84023 | <i>Acer pensylvanicum</i>          | Acer           | pensylvanicum  | Sapindaceae      | Moosewood, striped maple             | ST    | NC | John Stone | 3953 | 98.48 | 20 | RT |
| 84024 | <i>Helianthus giganteus</i>        | Helianthus     | giganteus      | Asteraceae       | Giant sunflower                      | PX    | NC | John Stone | 3954 | 97.94 | 20 | RT |
| 84025 | <i>Aristolochia macrophylla</i>    | Aristolochia   | macrophylla    | Aristolochiaceae | Pipevine                             | PX    | NC | John Stone | 3955 | 79.31 | 20 |    |
| 84458 | <i>Rhododendron cf. nudiflorum</i> | Rhododendron   | cf. nudiflorum | Ericaceae        | Pink azalea                          | PX    | NC | John Stone | 3956 | 0.45  | 20 |    |
| 84459 | <i>Ligusticum canadense</i>        | Ligusticum     | canadense      | Apiaceae         | Canadian licorice root               | P     | NC | John Stone | 3957 | 0.95  | 20 |    |

|       |                                |              |                |                 |                                                |       |    |            |      |        |    |    |
|-------|--------------------------------|--------------|----------------|-----------------|------------------------------------------------|-------|----|------------|------|--------|----|----|
| 84460 | <i>Thalictrum pubescens</i>    | Thalictrum   | pubescens      | Ranunculaceae   | Tall meadow-rue, King of the Meadow            | P     | NC | John Stone | 3958 | 10.98  | 20 |    |
| 84461 | <i>Solidago caesia</i>         | Solidago     | caesia         | Asteraceae      | Wreath goldenrod                               | PX    | NC | John Stone | 3959 | 89.74  | 20 |    |
| 84462 | <i>Viburnum nudum</i>          | Viburnum     | nudum          | Adoxaceae       | Smooth with the rod, possumhaw                 | LF    | NC | John Stone | 3960 | 7.28   | 20 |    |
| 84463 | <i>Viburnum nudum</i>          | Viburnum     | nudum          | Adoxaceae       | Smooth with the rod, possumhaw                 | FR    | NC | John Stone | 3960 | 98.88  | 20 | RT |
| 84465 | <i>Diervilla sessilifolia</i>  | Diervilla    | sessilifolia   | Caprifoliaceae  | Southern bush honeysuckle                      | ST    | NC | John Stone | 3961 | 100.02 | 20 | RT |
| 84466 | <i>Vaccinium pallidum</i>      | Vaccinium    | pallidum       | Ericaceae       | Blue ridge blueberry, early lowbush blueberry  | PX    | NC | John Stone | 3962 | 93.34  | 20 | RT |
| 84467 | <i>Magnolia tripetala</i>      | Magnolia     | tripetala      | Magnoliaceae    | Umbrella magnolia, umbrella tree               | LF    | NC | Greg Gust  | 220  | 99.83  | 20 | RT |
| 84468 | <i>Magnolia tripetala</i>      | Magnolia     | tripetala      | Magnoliaceae    | Umbrella magnolia, umbrella tree               | FR    | NC | Greg Gust  | 220  | 99.56  | 20 | RT |
| 84470 | <i>Ligustrum sinense</i>       | Ligustrum    | sinense        | Oleaceae        | Privet                                         | LF-FR | NC | Greg Gust  | 221  | 96.73  | 20 | RT |
| 84471 | <i>Ligustrum sinense</i>       | Ligustrum    | sinense        | Oleaceae        | Privet                                         | ST    | NC | Greg Gust  | 221  | 96.50  | 20 | RT |
| 84472 | <i>Leucothoe axillaris</i>     | Leucothoe    | axillaris      | Ericaceae       | Coastal doghobble                              | ST    | NC | Greg Gust  | 223  | 93.57  | 20 | RT |
| 84473 | <i>Leucothoe axillaris</i>     | Leucothoe    | axillaris      | Ericaceae       | Coastal doghobble                              | LF    | NC | Greg Gust  | 223  | 93.62  | 20 | RT |
| 84474 | <i>Mahonia bealei</i>          | Mahonia      | bealei         | Berberidaceae   | Leatherleaf mahonia                            | P     | NC | Greg Gust  | 225  | 92.47  | 20 | RT |
| 84475 | <i>Pastinaca sativa</i>        | Pastinaca    | sativa         | Apiaceae        | Parsnip                                        | ST    | NC | Greg Gust  | 226  | 4.28   | 20 |    |
| 84476 | <i>Eupatorium fistulosum</i>   | Eupatorium   | fistulosum     | Asteraceae      | Trumpetweed, Joe Pye weed, queen-of-the-meadow | LF-FL | NC | Greg Gust  | 227  | 98.69  | 20 | RT |
| 84477 | <i>Clethra acuminata</i>       | Clethra      | acuminata      | Clethraceae     | Mountain sweet pepper bush                     | LF-FR | NC | Greg Gust  | 228  | 65.32  | 20 |    |
| 84478 | <i>Clethra acuminata</i>       | Clethra      | acuminata      | Clethraceae     | Mountain sweet pepper bush                     | ST    | NC | Greg Gust  | 228  | 61.12  | 20 |    |
| 84479 | <i>Pastinaca sativa</i>        | Pastinaca    | sativa         | Apiaceae        | Parsnip                                        | LF-FL | NC | Greg Gust  | 226  | 99.82  | 20 | RT |
| 84480 | <i>Pastinaca sativa</i>        | Pastinaca    | sativa         | Apiaceae        | Parsnip                                        | RT    | NC | Greg Gust  | 226  | 22.57  | 20 |    |
| 84481 | <i>Solidago gigantea</i>       | Solidago     | gigantea       | Asteraceae      | Giant Goldenrod                                | P     | NC | Greg Gust  | 229  | 17.91  | 20 |    |
| 84482 | <i>Halesia carolina</i>        | Halesia      | carolina       | Styracaceae     | Silver-bell tree                               | LF    | NC | Greg Gust  | 230  | 0.31   | 20 |    |
| 84483 | <i>Laportea canadensis</i>     | Laportea     | canadensis     | Urticaceae      | Canadian wood nettle                           | P     | NC | Greg Gust  | 231  | 68.22  | 20 |    |
| 84484 | <i>Tilia heterophylla</i>      | Tilia        | heterophylla   | Malvaceae       | White basswood                                 | LF    | NC | Greg Gust  | 232  | 28.03  | 20 |    |
| 84485 | <i>Castanea dentata</i>        | Castanea     | dentata        | Fagaceae        | American sweet chestnut                        | LF    | NC | Greg Gust  | 233  | 97.05  | 20 | RT |
| 84486 | <i>Castanea dentata</i>        | Castanea     | dentata        | Fagaceae        | American sweet chestnut                        | ST    | NC | Greg Gust  | 233  | 97.64  | 20 | RT |
| 84487 | <i>Viburnum acerifolium</i>    | Viburnum     | acerifolium    | Adoxaceae       | Honeysuckle                                    | PX    | NC | Greg Gust  | 234  | 10.96  | 20 |    |
| 84488 | <i>Rubus odoratus</i>          | Rubus        | odoratus       | Rosaceae        | Thimbleberry                                   | LF-FL | NC | John Stone | 3963 | 99.78  | 20 | RT |
| 84489 | <i>Rubus odoratus</i>          | Rubus        | odoratus       | Rosaceae        | Thimbleberry                                   | ST    | NC | John Stone | 3963 | 97.45  | 20 | RT |
| 84490 | <i>Actaea racemosa</i>         | Actaea       | racemosa       | Ranunculaceae   | Black cohosh, black bugbane, black baneberry   | LF    | NC | John Stone | 3964 | 36.26  | 20 |    |
| 84491 | <i>Actaea racemosa</i>         | Actaea       | racemosa       | Ranunculaceae   | Black cohosh, black bugbane, black baneberry   | FR    | NC | John Stone | 3964 | 99.06  | 20 | RT |
| 84492 | <i>Actaea racemosa</i>         | Actaea       | racemosa       | Ranunculaceae   | Black cohosh, black bugbane, black baneberry   | RT    | NC | John Stone | 3964 | 62.98  | 20 |    |
| 84493 | <i>Vernonia noveboracensis</i> | Vernonia     | noveboracensis | Asteraceae      | New York ironweed                              | LF-FL | NC | John Stone | 3965 | 77.54  | 20 |    |
| 84494 | <i>Vernonia noveboracensis</i> | Vernonia     | noveboracensis | Asteraceae      | New York ironweed                              | ST    | NC | John Stone | 3965 | 5.46   | 20 |    |
| 84495 | <i>Diphylleia cymosa</i>       | Diphylleia   | cymosa         | Berberidaceae   | Umbrella leaf                                  | PX    | NC | John Stone | 3966 | 27.52  | 20 |    |
| 84496 | <i>Lindera benzoin</i>         | Lindera      | benzoin        | Lauraceae       | Spice bush                                     | PX    | NC | John Stone | 3967 | 90.95  | 20 | RT |
| 84497 | <i>Arunco dioicus</i>          | Arunco       | dioicus        | Rosaceae        | Goat's beard                                   | PX    | NC | John Stone | 3968 | 99.17  | 20 | RT |
| 84498 | <i>Heuchera villosa</i>        | Heuchera     | villosa        | Saxifragaceae   | Hairy alum root                                | P     | NC | John Stone | 3969 | 97.37  | 20 | RT |
| 84499 | <i>Liriodendron tulipifera</i> | Liriodendron | tulipifera     | Magnoliaceae    | Tulip tree                                     | LF    | NC | John Stone | 3970 | 93.07  | 20 | RT |
| 84500 | <i>Liriodendron tulipifera</i> | Liriodendron | tulipifera     | Magnoliaceae    | Tulip tree                                     | ST    | NC | John Stone | 3970 | 95.59  | 20 | RT |
| 84501 | <i>Dryopteris intermedia</i>   | Dryopteris   | intermedia     | Dryopteridaceae | Intermediate wood fern                         | P     | NC | John Stone | 3971 | 95.41  | 20 | RT |
| 84502 | <i>Adiantum pedatum</i>        | Adiantum     | pedatum        | Pteridaceae     | Northern maidenhair                            | P     | NC | John Stone | 3972 | 16.75  | 20 |    |
| 84504 | <i>Aralia racemosa</i>         | Aralia       | racemosa       | Araliaceae      | American spikenard                             | ST    | NC | John Stone | 3973 | 14.01  | 20 |    |
| 84505 | <i>Fagus grandifolia</i>       | Fagus        | grandifolia    | Fagaceae        | American beech                                 | LF-FR | NC | John Stone | 3974 | 90.47  | 20 | RT |
| 84506 | <i>Fagus grandifolia</i>       | Fagus        | grandifolia    | Fagaceae        | American beech                                 | ST    | NC | John Stone | 3974 | 5.74   | 20 |    |
| 84507 | <i>Viburnum cassinoides</i>    | Viburnum     | cassinoides    | Adoxaceae       | With the rod                                   | ST    | NC | John Stone | 3975 | 2.21   | 20 |    |
| 84508 | <i>Lobelia siphilitica</i>     | Lobelia      | siphilitica    | Campanulaceae   | Great blue lobelia                             | LF-FL | NC | John Stone | 3977 | 7.87   | 20 |    |
| 84509 | <i>Lobelia siphilitica</i>     | Lobelia      | siphilitica    | Campanulaceae   | Great blue lobelia                             | ST-RT | NC | John Stone | 3977 | 7.55   | 20 |    |
| 84510 | <i>Lespedeza bicolor</i>       | Lespedeza    | bicolor        | Fabaceae        | Lespedeza                                      | LF-FL | NC | John Stone | 3978 | 24.15  | 20 |    |
| 84511 | <i>Lespedeza bicolor</i>       | Lespedeza    | bicolor        | Fabaceae        | Lespedeza                                      | ST    | NC | John Stone | 3978 | 30.10  | 20 |    |
| 84512 | <i>Betula lutea</i>            | Betula       | lutea          | Betulaceae      | Yellow birch                                   | LF    | NC | John Stone | 3979 | 97.95  | 20 | RT |
| 84513 | <i>Betula lutea</i>            | Betula       | lutea          | Betulaceae      | Yellow birch                                   | ST    | NC | John Stone | 3979 | 29.24  | 20 |    |
| 84514 | <i>Betula lutea</i>            | Betula       | lutea          | Betulaceae      | Yellow birch                                   | BK    | NC | John Stone | 3979 | 5.07   | 20 |    |
| 84515 | <i>Hamamelis virginiana</i>    | Hamamelis    | virginiana     | Hamamelidaceae  | Witch hazel                                    | LF    | NC | John Stone | 3980 | 96.23  | 20 | RT |
| 84516 | <i>Hamamelis virginiana</i>    | Hamamelis    | virginiana     | Hamamelidaceae  | Witch hazel                                    | ST    | NC | John Stone | 3980 | 93.07  | 20 | RT |
| 84517 | <i>Cornus amomum</i>           | Cornus       | amomum         | Cornaceae       | Silky dogwood                                  | PX    | NC | John Stone | 3981 | 96.62  | 20 | RT |
| 84518 | <i>Rhododendron maximum</i>    | Rhododendron | maximum        | Ericaceae       | Rosebay rhododendron                           | LF-FL | NC | John Stone | 3982 | 92.85  | 20 | RT |
| 84519 | <i>Celastrus orbiculatus</i>   | Celastrus    | orbiculatus    | Celastraceae    | Oriental bittersweet                           | ST    | NC | Greg Gust  | 236  | 94.19  | 20 | RT |
| 84520 | <i>Celastrus orbiculatus</i>   | Celastrus    | orbiculatus    | Celastraceae    | Oriental bittersweet                           | LF    | NC | Greg Gust  | 236  | 12.57  | 20 |    |



|       |                                    |                 |               |                  |                                                     |          |        |                         |      |       |    |    |
|-------|------------------------------------|-----------------|---------------|------------------|-----------------------------------------------------|----------|--------|-------------------------|------|-------|----|----|
| 84521 | <i>Celastrus orbiculatus</i>       | Celastrus       | orbiculatus   | Celastraceae     | Oriental bittersweet                                | FR       | NC     | Greg Gust               | 236  | 13.97 | 20 |    |
| 84522 | <i>Arctium minus</i>               | Arctium         | minus         | Asteraceae       | Lesser burdock                                      | PX       | NC     | Greg Gust               | 237  | NA    | 20 |    |
| 84523 | <i>Osmunda regalis</i>             | Osmunda         | regalis       | Osmundaceae      | Royal fern                                          | PX       | NC     | Greg Gust               | 238  | 0.05  | 20 |    |
| 84524 | <i>Osmunda claytoniana</i>         | Osmunda         | claytoniana   | Osmundaceae      | Interrupted fern                                    | PX       | NC     | Greg Gust               | 239  | 1.22  | 20 |    |
| 84525 | <i>Lobelia puberula</i>            | Lobelia         | puberula      | Campanulaceae    | Downy lobelia                                       | P        | NC     | Greg Gust               | 240  | 6.83  | 20 |    |
| 84526 | <i>Lycopodium tristachyum</i>      | Lycopodium      | tristachyum   | Lycopodiaceae    | Deeproot clubmoss, groundcedar                      | PX       | NC     | Greg Gust               | 241  | 5.92  | 20 |    |
| 84527 | <i>Tamarix ramosissima</i>         | Tamarix         | ramosissima   | Tamaricaceae     | Tamarisk, saltcedar                                 | PX       | AZ     | Alan Brant              | 4039 | 9.25  | 20 |    |
| 84528 | <i>Pycnanthemum incanum</i>        | Pycnanthemum    | incanum       | Lamiaceae        | Hoary mountain mint                                 | P        | NC     | Greg Gust               | 244  | 36.24 | 20 |    |
| 84529 | <i>Elephantopus carolinianus</i>   | Elephantopus    | carolinianus  | Asteraceae       | Elephantsfoot                                       | P        | NC     | Greg Gust               | 246  | 98.28 | 20 | RT |
| 84530 | <i>Cirsium vulgare</i>             | Cirsium         | vulgare       | Asteraceae       | Common thistle                                      | PX       | NC     | Greg Gust               | 247  | 7.29  | 20 |    |
| 84531 | <i>Tradescantia subaspera</i>      | Tradescantia    | subaspera     | Commelinaceae    | Zigzag spiderwort                                   | PX       | NC     | Greg Gust               | 248  | 2.78  | 20 |    |
| 84533 | <i>Carya ovata</i>                 | Carya           | ovata         | Juglandaceae     | Shagbark hickory                                    | ST       | NC     | Greg Gust               | 249  | 9.98  | 20 |    |
| 84535 | <i>Ilex decidua</i>                | Ilex            | decidua       | Aquifoliaceae    | Possumhaw                                           | LF-FR    | NC     | John Stone              | 3983 | 9.64  | 20 |    |
| 84536 | <i>Ilex decidua</i>                | Ilex            | decidua       | Aquifoliaceae    | Possumhaw                                           | ST       | NC     | John Stone              | 3983 | 78.98 | 20 |    |
| 84537 | <i>Smilax herbacea</i>             | Smilax          | herbacea      | Smilacaceae      | Carrion flower                                      | LF-ST    | NC     | John Stone              | 3984 | 19.96 | 20 |    |
| 84538 | <i>Solidago bicolor</i>            | Solidago        | bicolor       | Asteraceae       | White goldenrod, silverrod                          | P        | NC     | John Stone              | 3985 | 88.41 | 20 |    |
| 84539 | <i>Rudbeckia fulgida</i>           | Rudbeckia       | fulgida       | Asteraceae       | Orange coneflower                                   | P        | NC     | John Stone              | 3986 | 5.43  | 20 |    |
| 84540 | <i>Aesculus octandra</i>           | Aesculus        | octandra      | Hippocastanaceae | Yellow buckeye                                      | ST       | NC     | John Stone              | 3988 | 6.74  | 20 |    |
| 84541 | <i>Aesculus octandra</i>           | Aesculus        | octandra      | Hippocastanaceae | Yellow buckeye                                      | FR       | NC     | John Stone              | 3988 | 98.93 | 20 | RT |
| 84542 | <i>Sorbus americana</i>            | Sorbus          | americana     | Rosaceae         | American mountain ash                               | LF       | NC     | John Stone              | 3989 | 23.45 | 20 |    |
| 84543 | <i>Sorbus americana</i>            | Sorbus          | americana     | Rosaceae         | American mountain ash                               | ST       | NC     | John Stone              | 3989 | 8.44  | 20 |    |
| 84544 | <i>Sorbus americana</i>            | Sorbus          | americana     | Rosaceae         | American mountain ash                               | FR       | NC     | John Stone              | 3989 | 26.01 | 20 |    |
| 84545 | <i>Coreopsis pubescens</i>         | Coreopsis       | pubescens     | Asteraceae       | Star tickseed                                       | P        | NC     | John Stone              | 3990 | 19.45 | 20 |    |
| 84657 | <i>Phalaris canariensis</i>        | Phalaris        | canariensis   | Poaceae          | Canary grass                                        | P[WHOLE] | Nevada | Eray Nixon              | NULL | NA    | 20 |    |
| 84658 | <i>Bromus carinatus</i>            | Bromus          | carinatus     | Poaceae          | Californian brome                                   | P[WHOLE] | Nevada | Eray Nixon              | NULL | 0.80  | 20 |    |
| 84659 | <i>Eruca vesicaria</i>             | Eruca           | vesicaria     | Brassicaceae     | Rocketsalad                                         | RT       | Nevada | Eray Nixon              | NULL | 1.10  | 20 |    |
| 84660 | <i>Caulanthus lasiophyllus</i>     | Caulanthus      | lasiophyllus  | Brassicaceae     | California mustard                                  | P[WHOLE] | Nevada | Eray Nixon              | NULL | 2.40  | 20 |    |
| 84661 | <i>Coronopus didymus</i>           | Coronopus       | didymus       | Brassicaceae     | Lesser swinecress                                   | P[WHOLE] | Nevada | Eray Nixon              | NULL | 11.93 | 20 |    |
| 84662 | <i>Delphinium andersonii</i>       | Delphinium      | andersonii    | Ranunculaceae    | Anderson's larkspur                                 | P[WHOLE] | Nevada | Eray Nixon              | NULL | 3.07  | 20 |    |
| 84663 | <i>Rumex hymenosepalus</i>         | Rumex           | hymenosepalus | Polygonaceae     | Canaigre                                            | ST       | Nevada | Eray Nixon              | NULL | 6.15  | 20 |    |
| 84664 | <i>Rumex hymenosepalus</i>         | Rumex           | hymenosepalus | Polygonaceae     | Canaigre                                            | LF       | Nevada | Eray Nixon              | NULL | 20.45 | 20 |    |
| 84665 | <i>Centaurea melitensis</i>        | Centaurea       | melitensis    | Asteraceae       | Maltese star thistle                                | ST-LF-FL | Nevada | Eray Nixon              | NULL | 8.33  | 20 |    |
| 84666 | <i>cf. Eriocameria brachylepis</i> | cf. Eriocameria | brachylepis   | Asteraceae       | Chaparral goldenbush                                | ST-LF-FL | Nevada | Eray Nixon              | NULL | 9.42  | 20 |    |
| 84667 | <i>Mirabilis bigelovii</i>         | Mirabilis       | bigelovii     | Nyctaginaceae    | Bigelow's desert four o'clock, desert wishbone bush | ST-LF-FL | Nevada | Eray Nixon              | NULL | 97.27 | 20 | RT |
| 84668 | <i>Chamaecrista fasciculata</i>    | Chamaecrista    | fasciculata   | Fabaceae         | Golden cassia, partridge pea                        | P        | FL     | Adam Bradley            | 1209 | 93.50 | 20 | RT |
| 84669 | <i>Cliftonia monophylla</i>        | Cliftonia       | monophylla    | Cyrtillaceae     | Buckwheat tree                                      | LF-FR    | FL     | John Stone              | 3427 | 95.13 | 20 | RT |
| 84670 | <i>Viburnum nudum</i>              | Viburnum        | nudum         | Adoxaceae        | Smooth withe rod, possumhaw                         | LF-FR    | FL     | Adam Bradley            | 1223 | 8.95  | 20 |    |
| 84671 | <i>Viburnum nudum</i>              | Viburnum        | nudum         | Adoxaceae        | Smooth withe rod, possumhaw                         | LF-ST    | FL     | Adam Bradley            | 1226 | 28.08 | 20 |    |
| 84672 | <i>Viburnum cf. nudum</i>          | Viburnum        | cf. nudum     | Adoxaceae        | Smooth withe rod, possumhaw                         | LF-FR    | FL     | Adam Bradley            | 1227 | 64.21 | 20 |    |
| 84673 | <i>Elephantopus elatus</i>         | Elephantopus    | elatus        | Asteraceae       | Tall elephantsfoot                                  | P        | FL     | Adam Bradley            | 1232 | 2.28  | 20 |    |
| 84674 | <i>Pinus palutis</i>               | Pinus           | palustris     | Pinaceae         | Pitch pine                                          | BK       | FL     | Karen Meyer             | 37   | 21.85 | 20 |    |
| 84675 | <i>Heuchera bracteata</i>          | Heuchera        | bracteata     | Saxifragaceae    | Bracted alumroot                                    | PX       | CO     | John Stone              | 3830 | 95.40 | 20 | RT |
| 84676 | <i>Potentilla fissa</i>            | Potentilla      | fissa         | Rosaceae         | Bigflower cinquefoil                                | P        | CO     | John Stone              | 3829 | 39.75 | 20 |    |
| 84677 | <i>Cornus stolonifera</i>          | Cornus          | stolonifera   | Cornaceae        | Redosier dogwood                                    | LF-FR    | CO     | John Stone              | 3834 | 96.91 | 20 | RT |
| 84678 | <i>Vaccinium erythrocarpum</i>     | Vaccinium       | erythrocarpum | Ericaceae        | Southern mountain cranberry                         | PX       | NC     | John Stone              | 3991 | 84.08 | 20 |    |
| 84679 | <i>Ceratozamia mexicana</i>        | Ceratozamia     | mexicana      | Zamiaceae        | Mexican Horncone                                    | LF       | MO     | Greg Gust               | 1007 | 8.32  | 20 |    |
| 84680 | <i>Philodendron radiatum</i>       | Philodendron    | radiatum      | Araceae          | Philodendron                                        | LF       | MO     | Greg Gust               | 967  | 18.48 | 20 |    |
| 84681 | <i>Samanea saman</i>               | Samanea         | saman         | Fabaceae         | Raintree                                            | ST       | MO     | Andrew Keith Townesmith | 665  | 2.23  | 20 |    |
| 84682 | <i>Pinus palutis</i>               | Pinus           | palustris     | Pinaceae         | Pitch pine                                          | LF       | FL     | Karen Meyer             | 37   | 72.20 | 20 |    |
| 84683 | <i>Quercus pumila</i>              | Quercus         | pumila        | Fagaceae         | Running oak                                         | LF-ST    | FL     | Karen Meyer             | 63   | 98.72 | 20 | RT |
| 84684 | <i>Sabal palmetto</i>              | Sabal           | palmetto      | Arecaceae        | Cabbage palmetto                                    | LF       | FL     | Andrew Keith Townesmith | 753  | 9.01  | 20 |    |
| 84685 | <i>Pinus serotina</i>              | Pinus           | serotina      | Pinaceae         | Pond pine                                           | LF       | FL     | Karen Meyer             | 102  | 96.61 | 20 | RT |
| 84686 | <i>Lyonia fruticosa</i>            | Lyonia          | fruticosa     | Ericaceae        | Coastal plain staggerbush                           | ST       | FL     | Andrew Keith Townesmith | 795  | 93.27 | 20 | RT |
| 84687 | <i>Livistonia chinensis</i>        | Livistonia      | chinensis     | Arecaceae        | Chinese Fan Palm                                    | LF       | HI     | Karen Meyer             | 321  | 21.62 | 20 |    |
| 84688 | <i>Bactris militaris</i>           | Bactris         | militaris     | Arecaceae        | Bactris palm                                        | LF       | HI     | Andrew Keith Townesmith | 1035 | 13.98 | 20 |    |
| 84689 | <i>Coix lacryma-jobi</i>           | Coix            | lacryma-jobi  | Poaceae          | Job's tears                                         | LF       | HI     | Andrew Keith Townesmith | 1046 | 12.13 | 20 |    |
| 84690 | <i>Rhapis excelsa</i>              | Rhapis          | excelsa       | Arecaceae        | Broadleaf lady palm, bamboo Palm                    | LF-FR    | MO     | Andrew Keith Townesmith | 344  | NA    | 20 |    |
| 84691 | <i>Quercus laevis</i>              | Quercus         | laevis        | Fagaceae         | American turkey oak                                 | LF       | FL     | Andrew Keith Townesmith | 800  | 93.38 | 20 | RT |
| 84692 | <i>Aspidotis densa</i>             | Aspidotis       | densa         | Pteridaceae      | Indian's dream                                      | PX       | CA     | Andrew Keith Townesmith | 885  | 16.95 | 20 |    |
| 84693 | <i>Nageia falcatus</i>             | Podocarpus      | macrophyllus  | Podocarpaceae    | Kusamaki                                            | LF       | HI     | Karen Meyer             | 317  | 33.96 | 20 |    |

|        |                                    |               |                    |                 |                                                                    |           |        |                         |      |       |    |    |
|--------|------------------------------------|---------------|--------------------|-----------------|--------------------------------------------------------------------|-----------|--------|-------------------------|------|-------|----|----|
| 84694  | <i>Aglaonema commutatum</i>        | Aglaonema     | commutatum         | Araceae         | Chinese or Philippine evergreen                                    | LF        | HI     | Andrew Keith Townesmith | 1029 | NA    | 20 |    |
| 84695  | <i>Oplismenus hirtellus</i>        | Oplismenus    | hirtellus          | Poaceae         | Basketgrass                                                        | PX        | HI     | Karen Meyer             | 331  | NA    | 20 |    |
| 84696  | <i>Ceiba pentandra</i>             | cf. Ceiba     | pentandra          | Bombacaceae     | Mallow                                                             | FL        | HI     | Andrew Keith Townesmith | 1040 | NA    | 20 |    |
| 84697  | <i>Zamia furfuracea</i>            | Zamia         | furfuracea         | Zamiaceae       | Cardboard Sago, Jamaican Sago, Mexican cycad                       | LF        | HI     | Andrew Keith Townesmith | 1042 | 1.14  | 20 |    |
| 84698  | <i>Arenga undulatifolia</i>        | Arenga        | undulatifolia      | Arecaceae       | Aren gelora                                                        | LF        | HI     | Karen Meyer             | 337  | NA    | 20 |    |
| 84699  | <i>Desmodium sandwicense</i>       | Desmodium     | sandwicense        | Fabaceae        | Hawai'i ticktrefoil                                                | P         | HI     | Karen Meyer             | 345  | NA    | 20 |    |
| 84700  | <i>Disotis rotundifolia</i>        | Dissotis      | rotundifolia       | Melastomataceae | Pinklady                                                           | P         | HI     | Karen Meyer             | 384  | NA    | 20 |    |
| 84701  | <i>Yucca harrimaniae</i>           | Yucca         | harrimaniae        | Agavaceae       | Spanish bayonet                                                    | ST        | Utah   | Eray Nixon              | NULL | NA    | 20 |    |
| 84702  | <i>Nicotiana attenuata</i>         | Nicotiana     | attenuata          | Solanaceae      | Coyote tobacco                                                     | ST-LF-IFL | Utah   | Eray Nixon              | NULL | 96.98 | 20 | RT |
| 84703  | <i>Vitis arizonica</i>             | Vitis         | arizonica          | Vitaceae        | Canyon grape                                                       | stem      | Utah   | Eray Nixon              | NULL | 93.70 | 20 | RT |
| 84704  | <i>Caesalpinia pulcherrima</i>     | Caesalpinia   | pulcherrima        | Fabaceae        | Poinciana, peacock flower, red bird of paradise, pride of Barbados | ST        | Nevada | Eray Nixon              | NULL | 96.81 | 20 | RT |
| 84705  | <i>Arundo donax</i>                | Arundo        | donax              | Poaceae         | Giant reed                                                         | ST        | Nevada | Eray Nixon              | NULL | NA    | 20 |    |
| 84706  | <i>Atriplex fruticulosa</i>        | Atriplex      | fruticulosa        | Chenopodiaceae  | Ball saltbush                                                      | ST-LF-FR  | Nevada | Eray Nixon              | NULL | NA    | 20 |    |
| 84707  | <i>Veronica anagallis-aquatica</i> | Veronica      | anagallis-aquatica | Plantaginaceae  | Water speedwell                                                    | P[WHOLE]  | Utah   | Eray Nixon              | NULL | 1.42  | 20 |    |
| 84708  | <i>Agrostis stolonifera</i>        | Agrostis      | stolonifera        | Poaceae         | Creeping bentgrass                                                 | P[WHOLE]  | Utah   | Eray Nixon              | NULL | NA    | 20 |    |
| 84709  | <i>Ribes montigenum</i>            | Ribes         | montigenum         | Grossulariaceae | Gooseberry-currant                                                 | ST        | Utah   | Eray Nixon              | NULL | 93.42 | 20 | RT |
| 84710  | <i>Atriplex hymenelytra</i>        | Atriplex      | hymenelytra        | Chenopodiaceae  | Desert holly                                                       | ST        | Nevada | Eray Nixon              | NULL | NA    | 20 |    |
| 84711  | <i>Atriplex lentiformis</i>        | Atriplex      | lentiformis        | Chenopodiaceae  | Quail bush                                                         | ST        | Nevada | Eray Nixon              | NULL | NA    | 20 |    |
| 84712  | <i>Quercus alba</i>                | Quercus       | alba               | Fagaceae        | White oak                                                          | BK        | MO     | John Stone              | 4257 | 91.28 | 20 | RT |
| 84713  | <i>Encelia farinosa</i>            | Encelia       | farinosa           | Asteraceae      | Brittle bush                                                       | RT        | CA     | Greg Gust               | 464  | 69.38 | 20 |    |
| 84714  | <i>Hemerocallis fulva</i>          | Hemerocallis  | fulva              | Liliaceae       | Orange Daylily, Tawny Daylily, Tiger Lily, Ditch Lily              | LF        | MO     | Andrew Keith Townesmith | 343  | NA    | 20 |    |
| 84715  | <i>Leea rubra</i>                  | Leea          | rubra              | Vitaceae        | West Indian holly, red leea                                        | ST        | MO     | Andrew Keith Townesmith | 364  | 97.08 | 20 | RT |
| 84716  | <i>Philodendron ferrugineum</i>    | Philodendron  | ferrugineum        | Araceae         | Philodendron                                                       | LF        | MO     | Greg Gust               | 962  | NA    | 20 |    |
| 84717  | <i>Urera baccifera</i>             | Urera         | baccifera          | Urticaceae      | Scratchbush                                                        | ST        | PR     | Andrew Keith Townesmith | 371  | NA    | 20 |    |
| 84718  | <i>Ribes missouriense</i>          | Ribes         | missouriense       | Grossulariaceae | Missouri gooseberry                                                | PX        | MO     | Tracy Scott             | 5    | NA    | 20 |    |
| 84719  | <i>Mahonia aquifolium</i>          | Mahonia       | aquifolium         | Berberidaceae   | Oregon grape                                                       | RT        | OR     | Andrew Keith Townesmith | 639  | NA    | 20 |    |
| 84720  | <i>Coccoloba pubescens</i>         | Coccoloba     | pubescens          | Polygonaceae    | Grandleaf seagrape                                                 | ST        | MO     | Andrew Keith Townesmith | 661  | 94.19 | 20 | RT |
| 84721  | <i>Cercocarpus minutiflorus</i>    | Cercocarpus   | minutiflorus       | Rosaceae        | Smooth mountain mahogany                                           | ST        | CA     | Karen Meyer             | 5    | NA    | 20 |    |
| 84722  | <i>Rhus integrifolia</i>           | Rhus          | integrifolia       | Anacardiaceae   | Lemonade berry                                                     | ST        | CA     | Karen Meyer             | 8    | 97.52 | 20 | RT |
| 84723  | <i>Quercus agrifolia</i>           | Quercus       | agrifolia          | Fagaceae        | Encina; coast live oak                                             | FR        | CA     | Andrew Keith Townesmith | 673  | NA    | 20 |    |
| 84724  | <i>Artemisia californica</i>       | Artemisia     | californica        | Asteraceae      | Wormwood                                                           | RT        | CA     | Andrew Keith Townesmith | 676  | NA    | 20 |    |
| 84725  | <i>Genista monspessulana</i>       | Genista       | monspessulana      | Fabaceae        | French broom                                                       | LF-ST     | CA     | Tracy Scott             | 118  | NA    | 20 |    |
| 84726  | <i>Quercus turbinella</i>          | Quercus       | turbinella         | Fagaceae        | Turbinella oak                                                     | LF        | CA     | Karen Meyer             | 23   | 48.92 | 20 |    |
| 84727  | <i>Adiantum capillus-veneris</i>   | Adiantum      | capillus-veneris   | Pteridaceae     | Maidenhair fern, Avenca                                            | P         | CA     | Andrew Keith Townesmith | 706  | NA    | 20 |    |
| 84728  | <i>Foeniculum vulgare</i>          | Foeniculum    | vulgare            | Apiaceae        | Fennel                                                             | LF        | CA     | Tracy Scott             | 155  | NA    | 20 |    |
| 84729  | <i>Pinus elliotii</i>              | Pinus         | elliottii          | Pinaceae        | Slash pine                                                         | ST        | FL     | Karen Meyer             | 36   | 38.09 | 20 |    |
| 84730  | <i>Quercus incana</i>              | Quercus       | incana             | Fagaceae        | Bluejack oak                                                       | LF        | FL     | Karen Meyer             | 47   | 67.08 | 20 |    |
| 84731  | <i>Hypericum hypericoides</i>      | Hypericum     | hypericoides       | Hypericaceae    | St. Andrews cross                                                  | ST        | FL     | Karen Meyer             | 53   | 97.91 | 20 | RT |
| 84733  | <i>Asimina obovata</i>             | Asimina       | obovata            | Annonaceae      | Bigflower papaw                                                    | LF        | FL     | Karen Meyer             | 86   | 24.04 | 20 |    |
| 84734  | <i>Cinnamomum camphora</i>         | Cinnamomum    | camphora           | Lauraceae       | Camphor                                                            | LF        | FL     | Karen Meyer             | 96   | 15.25 | 20 |    |
| 84735  | <i>Cinnamomum camphora</i>         | Cinnamomum    | camphora           | Lauraceae       | Camphor                                                            | BK        | FL     | Karen Meyer             | 96   | 11.94 | 20 |    |
| 84736  | <i>Rumex verticillata</i>          | Rumex         | verticillatus      | Polygonaceae    | Swamp dock                                                         | ST        | FL     | Andrew Keith Townesmith | 784  | 19.17 | 20 |    |
| 84737  | <i>Nuphar luteum</i>               | Nuphar        | luteum             | Nymphaeaceae    | Water lilly                                                        | FL        | FL     | Karen Meyer             | 103  | NA    | 20 |    |
| 84738  | <i>Nuphar luteum</i>               | Nuphar        | luteum             | Nymphaeaceae    | Water lilly                                                        | FR        | FL     | Karen Meyer             | 103  | 96.19 | 20 | RT |
| 84739  | <i>Lachnocaulon minus</i>          | Lachnocaulon  | minus              | Eriocaulaceae   | Small's bogbutton                                                  | P         | FL     | Karen Meyer             | 104  | 0.37  | 20 |    |
| 84740  | <i>Lyonia fruticosa</i>            | Lyonia        | fruticosa          | Ericaceae       | Coastal plain staggerbush                                          | LF-LF     | FL     | Andrew Keith Townesmith | 795  | 69.79 | 20 |    |
| 84741  | <i>Rhus copallinum</i>             | Rhus          | copallinum         | Anacardiaceae   | Shining, winged or dwarf sumac                                     | FR        | FL     | Andrew Keith Townesmith | 771  | 0.66  | 20 |    |
| 84742  | <i>Dombeya tiliaea</i>             | Dombeya       | tiliaea            | Malvaceae       | NULL                                                               | ST        | MO     | Karen Meyer             | 290  | 3.52  | 20 |    |
| 84743  | <i>Musa ornata</i>                 | Musa          | ornata             | Musaceae        | Flowering or ornamental banana                                     | LF        | HI     | Karen Meyer             | 306  | 16.44 | 20 |    |
| 84744  | <i>Spathiphyllum wallisii</i>      | Spathiphyllum | wallisii           | Araceae         | Peace lily                                                         | ST        | HI     | Karen Meyer             | 304  | 13.83 | 20 |    |
| 131665 | Difluoromethylornithine            |               |                    |                 |                                                                    |           |        |                         |      | 99    | 20 |    |

Plant parts BK- stem bark, LF- leaves, FL- flowers, ST- stem, RT-root, FR-fruit ; RT- samples retested in secondary assay

**Table S2- Secondary screening of active plants extracts against Trypanosoma brucei**

| NPID  | SampleName                       | Plant Part | <i>T. brucei</i><br>IC50<br>(µg/mL) | Standard<br>deviation IC 50 | <i>T brucei</i><br>IC90<br>(mg/mL) | Standard<br>deviation IC 50 | THP1 % inhibition<br>at 20 µg/mL |
|-------|----------------------------------|------------|-------------------------------------|-----------------------------|------------------------------------|-----------------------------|----------------------------------|
| 81877 | <i>Ulex europaea</i>             | BK         | 4.05                                | 0.78                        | >10                                | NA                          | 0.00                             |
| 81880 | <i>Alnus rubra</i>               | BK         | 0.94                                | 0.58                        | 1.95                               | 0.17                        | 1.98                             |
| 81883 | <i>Rumex obtusifolius</i>        | FR         | 3.69                                | 0.06                        | 7.28                               | 0.12                        | 2.61                             |
| 81886 | <i>Arctostaphylos canescens</i>  | LF         | 3.27                                | 0.24                        | 6.00                               | 0.07                        | 3.79                             |
| 81890 | <i>Boykinia major</i>            | RT         | 2.82                                | 0.44                        | 8.31                               | 1.50                        | 4.69                             |
| 81892 | <i>Phacelia hastata</i>          | PX         | 5.03                                | 2.64                        | 7.70                               | 1.42                        | 2.79                             |
| 81895 | <i>Abies procera</i>             | FR         | 4.22                                | 0.23                        | 7.03                               | 0.24                        | 6.56                             |
| 81896 | <i>Abies procera</i>             | BK         | 3.74                                | 0.22                        | 6.38                               | 0.09                        | 6.93                             |
| 81897 | <i>Juniperus communis</i>        | LF-ST      | 2.40                                | 0.44                        | 6.66                               | 2.13                        | 0.00                             |
| 81899 | <i>Boykinia occidentalis</i>     | P          | 3.03                                | 0.30                        | 7.04                               | 0.26                        | 0.99                             |
| 81900 | <i>Gaultheria ovatifolia</i>     | P          | 3.08                                | 0.07                        | 7.01                               | 0.11                        | 0.78                             |
| 81907 | <i>Ribes lacustre</i>            | PX         | 3.62                                | 0.24                        | 6.31                               | 0.41                        | 2.66                             |
| 81908 | <i>Chrysolepis chrysophylla</i>  | FL         | 2.89                                | 0.40                        | 7.31                               | 1.57                        | 3.05                             |
| 81912 | <i>Quercus chrysolepis</i>       | LF         | 2.62                                | 0.67                        | >10                                | NA                          | 3.17                             |
| 81914 | <i>Hypericum calycinum</i>       | RT         | >10                                 | NA                          | >10                                | NA                          | 2.94                             |
| 81918 | <i>Quercus chrysolepis</i>       | BK         | 3.97                                | 0.29                        | 7.27                               | 0.26                        | 7.21                             |
| 81919 | <i>Ribes roezlii</i>             | PX         | 3.21                                | 0.22                        | 6.35                               | 0.13                        | 0.00                             |
| 81925 | <i>Rhododendron occidentale</i>  | LF         | 2.87                                | 0.43                        | 6.88                               | 1.16                        | 2.45                             |
| 81927 | <i>Aralia californica</i>        | FR         | 5.68                                | 2.39                        | 7.08                               | 1.83                        | 1.86                             |
| 81929 | <i>Aralia californica</i>        | LF         | 7.34                                | 0.80                        | >10                                | NA                          | 3.44                             |
| 81932 | <i>Darmera peltata</i>           | LF         | 3.34                                | 0.14                        | 6.18                               | 0.02                        | 5.71                             |
| 81940 | <i>Arctostaphylos viscida</i>    | LF         | 2.88                                | 0.21                        | 5.96                               | 1.09                        | 6.49                             |
| 81943 | <i>Sanguisorba officinalis</i>   | LF         | 3.56                                | 0.39                        | 7.50                               | 0.16                        | 7.67                             |
| 81944 | <i>Sanguisorba officinalis</i>   | ST-FL      | 3.87                                | 0.22                        | 6.90                               | 0.37                        | 9.86                             |
| 81946 | <i>Lithocarpus densiflorus</i>   | FR         | 3.17                                | 0.09                        | 6.18                               | 0.02                        | 0.00                             |
| 81947 | <i>Pinus lambertiana</i>         | LF         | 3.18                                | 0.50                        | 6.62                               | 1.28                        | 1.46                             |
| 81953 | <i>Eriogonum umbellatum</i>      | LF-ST      | 2.79                                | 0.34                        | 6.25                               | 1.94                        | 0.53                             |
| 81957 | <i>Arceuthobium campylopodum</i> | PX         | 6.88                                | 1.40                        | >10                                | NA                          | 4.63                             |
| 81959 | <i>Ceanothus cordulatus</i>      | PX         | 4.33                                | 0.18                        | 7.23                               | 0.22                        | 4.29                             |
| 82402 | <i>Lotus crassifolius</i>        | FR         | >10                                 | NA                          | >10                                | NA                          | 5.80                             |
| 82407 | <i>Potentilla gracilis</i>       | ST-FR      | 3.33                                | 0.33                        | 6.56                               | 0.28                        | 7.36                             |
| 82411 | <i>Hylocomium cf. splendens</i>  | P          | 4.78                                | 0.18                        | 7.55                               | 0.17                        | 8.56                             |
| 82423 | <i>Ludovia lancifolia</i>        | LF         | 3.73                                | 0.10                        | 5.84                               | 0.18                        | 0.00                             |
| 82425 | <i>Solandra longifolia</i>       | ST         | >10                                 | NA                          | >10                                | NA                          | 0.00                             |
| 82426 | <i>Clerodendron splendens</i>    | LF         | >10                                 | NA                          | >10                                | NA                          | 1.71                             |
| 82429 | <i>Quercus ilex</i>              | ST         | 5.20                                | 0.44                        | 8.37                               | 0.63                        | 2.89                             |
| 82430 | <i>Medinilla magnifica</i>       | ST         | 3.96                                | 0.32                        | 6.81                               | 0.32                        | 4.54                             |
| 82435 | <i>Ceanothus greggi</i>          | LF         | 3.90                                | 0.18                        | 7.25                               | 0.07                        | 4.62                             |
| 82436 | <i>Quercus berberidifolia</i>    | LF-ST      | 3.14                                | 0.32                        | 6.53                               | 0.55                        | 6.06                             |
| 82438 | <i>Eriogonum fasciculatum</i>    | LF         | 2.68                                | 0.44                        | 7.73                               | 2.33                        | 9.43                             |
| 82440 | <i>Rhus integrifolia</i>         | LF         | 2.97                                | 0.01                        | 4.41                               | 0.29                        | 2.28                             |
| 82441 | <i>Quercus x acutidens</i>       | ST         | >10                                 | NA                          | >10                                | NA                          | 1.03                             |
| 82444 | <i>Baccharis salicifolia</i>     | LF-FL      | 5.04                                | 0.91                        | >10                                | NA                          | 1.20                             |
| 82446 | <i>Penstemon spectabilis</i>     | RT         | 3.20                                | 0.15                        | 7.02                               | 0.08                        | 3.23                             |
| 82449 | <i>Alnus rhombifolia</i>         | FL         | 4.95                                | 0.32                        | >10                                | NA                          | 3.25                             |
| 82451 | <i>Baccharis pilularis</i>       | LF         | >10                                 | NA                          | >10                                | NA                          | 1.54                             |
| 82453 | <i>Hoita macrostachya</i>        | LF         | 0.48                                | 0.00                        | 0.62                               | 0.00                        | 3.32                             |
| 82460 | <i>Ceanothus spinosa</i>         | LF         | 3.38                                | 0.22                        | 7.99                               | 0.05                        | 6.11                             |
| 82461 | <i>Ceanothus spinosus</i>        | ST         | 4.19                                | 0.11                        | 7.55                               | 0.20                        | 3.24                             |
| 82463 | <i>Mimulus longiflorus</i>       | RT         | 4.08                                | 0.51                        | 7.89                               | 1.33                        | 3.31                             |
| 82466 | <i>Lepechinia calycina</i>       | LF         | 2.50                                | 0.05                        | 5.04                               | 0.12                        | 3.91                             |
| 82467 | <i>Ribes speciosum</i>           | LF-ST-FL   | 2.95                                | 0.10                        | 5.90                               | 0.08                        | 3.70                             |
| 82468 | <i>Salvia spathacea</i>          | ST         | 1.13                                | 0.78                        | 3.46                               | 0.34                        | 6.86                             |
| 82484 | <i>Sabal minor</i>               | FL         | 1.06                                | 0.44                        | 2.07                               | 0.96                        | 4.93                             |
| 83280 | <i>Quercus geminata</i>          | LF         | 7.72                                | 0.23                        | >10                                | NA                          | 5.16                             |
| 83284 | <i>Pinus serotina</i>            | BK         | 8.37                                | 0.51                        | 9.86                               | 0.12                        | 7.08                             |
| 83289 | <i>Eriocaulon anceps</i>         | P          | 4.89                                | 3.51                        | >10                                | NA                          | 6.05                             |

|       |                                  |       |      |      |      |      |       |
|-------|----------------------------------|-------|------|------|------|------|-------|
| 83291 | <i>Salix caroliniana</i>         | LF    | 2.24 | 1.52 | >10  | NA   | 8.02  |
| 83294 | <i>Berlandiera subacaulis</i>    | LF    | >10  | NA   | >10  | NA   | 7.21  |
| 83307 | <i>Eriogonum nudum</i>           | ST-FL | 6.22 | 2.92 | 8.39 | 1.43 | 8.32  |
| 83309 | <i>Arceuthobium occidentale</i>  | P     | 2.47 | 2.23 | >10  | NA   | 9.71  |
| 83317 | <i>Spathiphyllum wallisii</i>    | LF    | 2.78 | NA   | >10  | NA   | 8.93  |
| 83319 | <i>Syzygium malaccense</i>       | LF    | 2.76 | 0.46 | >10  | NA   | 8.35  |
| 83323 | <i>Elaeocarpus angustifolius</i> | LF    | 3.22 | 0.29 | 8.47 | 0.55 | 10.31 |
| 83329 | <i>Syzygium aqueum</i>           | LF    | 1.84 | NA   | >10  | NA   | 6.32  |
| 83334 | <i>Medinilla magnifica</i>       | FL-FR | 2.25 | 1.16 | 7.89 | 2.48 | 4.30  |
| 83335 | <i>Ficus trigonata</i>           | LF    | >10  | NA   | >10  | NA   | 8.92  |
| 83345 | <i>Eucalyptus citriodora</i>     | LF    | 2.91 | 0.21 | 5.82 | 0.04 | 4.30  |
| 83347 | <i>Schefflera actinophylla</i>   | LF    | 4.59 | 0.80 | >10  | NA   | 4.79  |
| 83351 | <i>Eucalyptus citriodora</i>     | BK    | 2.63 | 0.78 | >10  | NA   | 6.09  |
| 83357 | <i>Ardisia elliptica</i>         | LF    | >10  | NA   | >10  | NA   | 7.37  |
| 83358 | <i>Nymphaea odorata</i>          | FL    | 3.53 | 0.06 | 6.33 | 0.02 | 9.26  |
| 83360 | <i>Acer rubrum</i>               | LF    | 2.88 | 0.50 | 7.45 | 0.70 | 6.29  |
| 83361 | <i>Acer rubrum</i>               | ST    | 2.06 | 1.63 | >10  | NA   | 7.67  |
| 83364 | <i>Verbesina virginica</i>       | LF-FL | 3.19 | 0.24 | 6.61 | 0.18 | 4.75  |
| 83938 | <i>Chamaecrista nictitans</i>    | P     | 5.76 | 0.73 | >10  | NA   | 7.86  |
| 83944 | <i>Geranium richardsonii</i>     | P     | 3.26 | 0.05 | 6.86 | 0.57 | 8.29  |
| 83947 | <i>Arnica cordifolia</i>         | P     | >10  | NA   | >10  | NA   | 8.30  |
| 83954 | <i>Pinus aristata</i>            | P     | 2.42 | 0.17 | >10  | NA   | 8.08  |
| 83956 | <i>Vaccinium scoparium</i>       | P     | >10  | NA   | >10  | NA   | 8.41  |
| 83957 | <i>Arnica mollis</i>             | P     | >10  | NA   | >10  | NA   | 0.00  |
| 83959 | <i>Saxifraga odontoloma</i>      | P     | >10  | NA   | >10  | NA   | 0.00  |
| 83961 | <i>Ribes montigenum</i>          | PX    | 2.98 | 0.91 | >10  | NA   | 0.94  |
| 83963 | <i>Rubus deliciosus</i>          | PX    | 3.99 | 0.20 | 7.04 | 0.16 | 2.27  |
| 83972 | <i>Ribes cf. leptanthum</i>      | PX    | 7.38 | 0.98 | >10  | NA   | 5.87  |
| 83981 | <i>Convolvulus arvensis</i>      | P     | >10  | NA   | >10  | NA   | 6.22  |
| 83986 | <i>Yucca glauca</i>              | ST    | 3.56 | 0.49 | >10  | NA   | 8.34  |
| 83991 | <i>Bahia oppositifolia</i>       | P     | 3.77 | 1.01 | 5.51 | 1.15 | 8.46  |
| 83995 | <i>Senecio spartioides</i>       | PX    | >10  | NA   | >10  | NA   | 0.00  |
| 84003 | <i>Magnolia fraseri</i>          | ST    | 7.29 | 0.32 | >10  | NA   | 0.00  |
| 84006 | <i>Asclepias exaltata</i>        | FR    | 4.13 | 3.85 | >10  | NA   | 0.98  |
| 84008 | <i>Rhododendron catawbiense</i>  | LF    | 4.17 | 1.37 | >10  | NA   | 1.99  |
| 84009 | <i>Rhododendron catawbiense</i>  | ST    | >10  | NA   | >10  | NA   | 4.42  |
| 84010 | <i>Rhododendron catawbiense</i>  | FR    | 4.45 | 0.00 | 7.86 | 0.02 | 5.39  |
| 84014 | <i>Ilex ambigua</i>              | ST    | 3.41 | 0.15 | 6.46 | 0.21 | 4.84  |
| 84020 | <i>Elaeagnus umbellata</i>       | ST    | >10  | NA   | >10  | NA   | 10.20 |
| 84022 | <i>Tsuga canadensis</i>          | PX    | 4.07 | 0.21 | 7.04 | 0.16 | 0.00  |
| 84023 | <i>Acer pensylvanicum</i>        | ST    | 3.20 | 0.20 | 6.14 | 0.18 | 0.17  |
| 84024 | <i>Helianthus giganteus</i>      | PX    | 3.03 | 0.09 | 6.05 | 0.02 | 1.11  |
| 84463 | <i>Viburnum nudum</i>            | FR    | >10  | NA   | >10  | NA   | 2.61  |
| 84465 | <i>Diervilla sessilifolia</i>    | ST    | 3.76 | 0.80 | 6.38 | 0.65 | 3.30  |
| 84466 | <i>Vaccinium pallidum</i>        | PX    | >10  | NA   | >10  | NA   | 4.55  |
| 84467 | <i>Magnolia tripetala</i>        | LF    | 3.06 | 0.18 | 4.96 | 0.45 | 4.36  |
| 84468 | <i>Magnolia tripetala</i>        | FR    | 5.97 | 2.41 | >10  | NA   | 6.74  |
| 84470 | <i>Ligustrum sinense</i>         | LF-FR | 2.77 | 0.40 | 4.41 | 1.46 | 0.00  |
| 84471 | <i>Ligustrum sinense</i>         | ST    | 4.90 | 2.74 | 7.19 | 1.85 | 0.00  |
| 84472 | <i>Leucothoe axillaris</i>       | ST    | 7.54 | 0.17 | 9.31 | 0.02 | 0.00  |
| 84473 | <i>Leucothoe axillaris</i>       | LF    | 7.63 | 0.36 | 9.31 | 0.12 | 0.00  |
| 84474 | <i>Mahonia bealei</i>            | P     | 9.18 | NA   | >10  | NA   | 3.46  |
| 84476 | <i>Eupatorium fistulosum</i>     | LF-FL | >10  | NA   | >10  | NA   | 4.13  |
| 84479 | <i>Pastinaca sativa</i>          | LF-FL | 8.50 | 1.11 | >10  | NA   | 4.87  |
| 84485 | <i>Castanea dentata</i>          | LF    | >10  | NA   | >10  | NA   | 7.03  |
| 84486 | <i>Castanea dentata</i>          | ST    | 4.57 | NA   | 8.34 | 1.67 | 0.00  |
| 84488 | <i>Rubus odoratus</i>            | LF-FL | 1.95 | 2.01 | >10  | NA   | 0.00  |
| 84489 | <i>Rubus odoratus</i>            | ST    | 5.58 | 1.05 | >10  | NA   | 0.00  |
| 84491 | <i>Actaea racemosa</i>           | FR    | 3.40 | 0.28 | 5.20 | 0.16 | 2.17  |
| 84496 | <i>Lindera benzoin</i>           | PX    | 4.94 | NA   | >10  | NA   | 3.99  |
| 84497 | <i>Aruncus dioicus</i>           | PX    | 5.74 | 5.53 | >10  | NA   | 5.94  |

|                                                                                        |                                  |           |       |       |       |       |       |
|----------------------------------------------------------------------------------------|----------------------------------|-----------|-------|-------|-------|-------|-------|
| 84498                                                                                  | <i>Heuchera villosa</i>          | P         | 3.50  | 1.12  | 5.96  | 0.70  | 7.42  |
| 84499                                                                                  | <i>Liriodendron tulipifera</i>   | LF        | 4.75  | 0.39  | 7.82  | 0.10  | 9.84  |
| 84500                                                                                  | <i>Liriodendron tulipifera</i>   | ST        | >10   | NA    | >10   | NA    | 0.00  |
| 84501                                                                                  | <i>Dryopteris intermedia</i>     | P         | 4.29  | 3.61  | >10   | NA    | 0.00  |
| 84505                                                                                  | <i>Fagus grandifolia</i>         | LF-FR     | 6.47  | 2.20  | >10   | NA    | 1.59  |
| 84512                                                                                  | <i>Betula lutea</i>              | LF        | 6.26  | 0.99  | >10   | NA    | 2.31  |
| 84515                                                                                  | <i>Hamamelis virginiana</i>      | LF        | 3.29  | 0.24  | 5.75  | 0.16  | 2.53  |
| 84516                                                                                  | <i>Hamamelis virginiana</i>      | ST        | 2.54  | 0.53  | 4.65  | 3.92  | 2.89  |
| 84517                                                                                  | <i>Cornus amomum</i>             | PX        | 3.24  | 0.61  | 8.07  | 1.19  | 3.53  |
| 84518                                                                                  | <i>Rhododendron maximum</i>      | LF-FL     | 4.24  | 0.13  | 8.24  | 0.08  | 5.61  |
| 84519                                                                                  | <i>Celastrus orbiculatus</i>     | ST        | >10   | NA    | >10   | NA    | 0.00  |
| 84529                                                                                  | <i>Elephantopus carolinianus</i> | P         | 4.76  | NA    | >10   | NA    | 0.00  |
| 84541                                                                                  | <i>Aesculus octandra</i>         | FR        | 5.74  | 5.53  | >10   | NA    | 37.87 |
| 84667                                                                                  | <i>Mirabilis biglovii</i>        | ST-LF-FL  | 3.50  | 1.12  | 5.96  | 0.70  | 0.00  |
| 84668                                                                                  | <i>Chamaecrista fasciculata</i>  | P         | 4.75  | 0.39  | 7.82  | 0.10  | 1.58  |
| 84669                                                                                  | <i>Cliftonia monophylla</i>      | LF-FR     | >10   | NA    | >10   | NA    | 2.52  |
| 84675                                                                                  | <i>Heuchera bracteata</i>        | PX        | 4.29  | 3.61  | >10   | NA    | 4.66  |
| 84677                                                                                  | <i>Cornus stolonifera</i>        | LF-FR     | 6.47  | 2.20  | >10   | NA    | 7.68  |
| 84683                                                                                  | <i>Quercus pumila</i>            | LF-ST     | 6.26  | 0.99  | >10   | NA    | 0.00  |
| 84685                                                                                  | <i>Pinus serotina</i>            | LF        | 3.29  | 0.24  | 5.75  | 0.16  | 0.00  |
| 84686                                                                                  | <i>Lyonia fruticosa</i>          | ST        | 2.54  | 0.71  | 4.65  | 3.92  | 0.00  |
| 84691                                                                                  | <i>Quercus laevis</i>            | LF        | 3.24  | 0.61  | 8.07  | 1.19  | 1.89  |
| 84702                                                                                  | <i>Nicotiana attenuata</i>       | ST-LF-IFL | 4.24  | 0.13  | 8.24  | 0.08  | 1.65  |
| 84703                                                                                  | <i>Vitis arizonica</i>           | stem      | >10   | NA    | >10   | NA    | 1.83  |
| 84704                                                                                  | <i>Caesalpinia pulcherrima</i>   | ST        | 4.76  | NA    | >10   | NA    | 2.17  |
| 84709                                                                                  | <i>Ribes montigenum</i>          | ST        | 1.94  | 0.67  | 7.39  | 2.74  | 6.82  |
| 84712                                                                                  | <i>Quercus alba</i>              | BK        | 1.42  | 0.30  | 7.53  | 0.44  | 0.00  |
| 84715                                                                                  | <i>Leea rubra</i>                | ST        | 1.62  | 0.32  | 4.50  | 1.04  | 0.00  |
| 84720                                                                                  | <i>Coccoloba pubescens</i>       | ST        | 0.83  | 0.04  | 1.91  | 0.16  | 0.00  |
| 84722                                                                                  | <i>Rhus integrifolia</i>         | ST        | 0.50  | 0.10  | 1.07  | 0.33  | 0.00  |
| 84731                                                                                  | <i>Hypericum hypericoides</i>    | ST        | 2.28  | 1.03  | >10   | NA    | 0.00  |
| 84738                                                                                  | <i>Nuphar luteum</i>             | FR        | 0.42  | 0.02  | 1.32  | 0.11  | 0.00  |
| 131665                                                                                 | Difluoromethylornithine          |           | 5.07  | 0.27  | 12.37 | 0.96  | 1.40  |
| 103650                                                                                 | Pentamidine                      |           | 0.002 | 0.001 | 0.003 | 0.001 | 0.00  |
| <b>Plant parts BK- stem bark, LF- leaves, FL- flowers, ST- stem, RT-root, FR-fruit</b> |                                  |           |       |       |       |       |       |
